# Supplementary material
Source: publisher figshare collection journal article supplement (https://geolsoc.figshare.com/ndownloader/files/34179997)
Supplement: Supplementary file 1 [file 34179997]

iter	time	topo	loglik	length	alpha	Nmode	statent	statalpha
0	1	100	-2.38505e+06	13.2279	1	14	2.49214	20
1	1	100	-1.46828e+06	15.5013	0.467688	23	1.77029	11.4045
2	1	100	-1.42382e+06	18.3339	0.438689	41	1.68747	10.5309
3	1	100	-1.3935e+06	18.8688	0.440991	43	1.65169	9.02301
4	1	100	-1.37103e+06	17.8738	0.452568	48	1.57673	7.96814
5	1	100	-1.34676e+06	17.407	0.46476	60	1.53025	8.79027
6	1	100	-1.32166e+06	17.2821	0.476767	80	1.48553	8.39087
7	1	100	-1.29663e+06	17.4717	0.487002	109	1.44865	8.47012
8	1	100	-1.28268e+06	17.4693	0.48888	134	1.43232	8.42857
9	1	100	-1.27358e+06	17.5154	0.489426	151	1.41468	8.7228
10	1	100	-1.26815e+06	17.4753	0.489093	186	1.40376	8.66449
11	1	100	-1.2629e+06	17.2401	0.491544	207	1.38877	8.05764
12	1	100	-1.25605e+06	17.288	0.496009	233	1.37488	8.41203
13	1	100	-1.24945e+06	17.2643	0.501527	248	1.36251	8.07681
14	1	100	-1.24487e+06	17.2223	0.503304	277	1.35292	7.95974
15	1	100	-1.2375e+06	17.165	0.503843	294	1.3399	7.51963
16	1	100	-1.23221e+06	17.1424	0.505501	327	1.32305	7.22318
17	1	100	-1.22834e+06	17.2029	0.505729	355	1.30713	7.22368
18	1	100	-1.2264e+06	17.3347	0.506709	379	1.29859	7.0197
19	1	100	-1.22332e+06	17.3899	0.512796	415	1.29311	7.01422
20	1	100	-1.22046e+06	17.2869	0.513167	425	1.28029	6.7864
21	1	100	-1.21814e+06	17.379	0.514891	465	1.27007	6.80555
22	1	100	-1.21553e+06	17.2146	0.517079	461	1.26131	6.63102
23	1	100	-1.21384e+06	17.1223	0.519222	475	1.25441	6.58159
24	1	100	-1.21084e+06	17.1854	0.522249	498	1.24966	6.49383
25	1	100	-1.20733e+06	16.7013	0.52217	512	1.23635	6.46269
26	1	100	-1.20563e+06	16.4532	0.531513	515	1.22841	6.45101
27	1	100	-1.20454e+06	16.3776	0.53477	529	1.22397	6.21588
28	1	100	-1.2015e+06	16.1344	0.533677	545	1.21078	6.31682
29	1	100	-1.20008e+06	15.9233	0.542359	565	1.20745	6.10017
30	1	100	-1.1984e+06	15.9253	0.550374	580	1.20276	6.00477
31	1	100	-1.19692e+06	15.6871	0.558494	560	1.19609	6.03962
32	1	100	-1.19625e+06	15.724	0.563869	582	1.19396	5.94116
33	1	100	-1.19419e+06	15.6532	0.562116	630	1.18484	6.00492
34	1	100	-1.19148e+06	15.6823	0.569128	618	1.1765	6.01174
35	1	100	-1.1887e+06	15.589	0.577032	627	1.17546	5.90824
36	1	100	-1.18599e+06	15.8402	0.575124	623	1.1651	5.74943
37	1	100	-1.18461e+06	15.6429	0.585589	641	1.15777	5.7538
38	1	100	-1.18338e+06	15.6035	0.594157	657	1.14599	5.84227
39	1	100	-1.18217e+06	15.7563	0.602393	673	1.13801	5.72049
40	1	100	-1.18141e+06	15.5988	0.606274	657	1.13223	5.71518
41	1	100	-1.18052e+06	15.7423	0.611793	665	1.12903	5.76686
42	1	100	-1.18002e+06	15.5108	0.615047	642	1.12974	5.7237
43	1	100	-1.17951e+06	15.5011	0.620487	659	1.12444	5.73713
44	1	100	-1.17866e+06	15.539	0.628954	670	1.11891	5.77617
45	1	100	-1.17826e+06	15.683	0.635348	677	1.12194	5.54473
46	1	100	-1.17779e+06	15.6072	0.642406	701	1.11791	5.45981
47	1	100	-1.17693e+06	15.6634	0.642889	722	1.11483	5.55117
48	1	100	-1.17633e+06	15.6201	0.64496	706	1.11493	5.7167
49	1	100	-1.17586e+06	15.5833	0.648795	705	1.10559	5.54231
50	1	100	-1.17511e+06	15.5757	0.646485	720	1.10548	5.47294
51	1	100	-1.17436e+06	15.4666	0.655166	725	1.10051	5.47709
52	1	100	-1.17357e+06	15.4542	0.654232	752	1.09669	5.39051
53	1	100	-1.17314e+06	15.4566	0.666019	729	1.09208	5.59715
54	1	100	-1.17223e+06	15.4222	0.669614	734	1.08891	5.39175
55	1	100	-1.17149e+06	15.3808	0.680088	763	1.07904	5.29564
56	1	100	-1.17091e+06	15.3747	0.693885	757	1.07574	5.50286
57	1	100	-1.1695e+06	15.3452	0.697564	773	1.06516	5.16277
58	1	100	-1.16913e+06	15.4144	0.705762	763	1.06616	5.24698
59	1	100	-1.16918e+06	15.3634	0.710138	770	1.0642	5.2689
60	1	100	-1.1689e+06	15.3613	0.711584	774	1.06433	5.23032
61	1	100	-1.168e+06	15.636	0.710535	789	1.06208	5.28563
62	1	100	-1.16751e+06	15.5767	0.713924	775	1.05908	5.26658
63	1	100	-1.16775e+06	15.6418	0.714456	769	1.05847	5.31164
64	1	100	-1.16713e+06	15.6269	0.726771	770	1.05396	5.28485
65	1	100	-1.16672e+06	15.7208	0.737799	789	1.05442	5.34363
66	1	100	-1.1665e+06	15.4242	0.745634	782	1.04601	5.22588
67	1	100	-1.16572e+06	15.494	0.746852	778	1.04765	5.29177
68	1	100	-1.1661e+06	15.3288	0.749245	793	1.04638	5.26184
69	1	100	-1.1651e+06	15.2166	0.756831	801	1.03845	5.21348
70	1	100	-1.16534e+06	15.3275	0.75924	799	1.03793	5.25577
71	1	100	-1.16485e+06	15.3501	0.766304	811	1.03684	5.25326
72	1	100	-1.16475e+06	15.2539	0.774455	769	1.03758	5.40705
73	1	100	-1.16433e+06	15.3204	0.781322	797	1.03458	5.23952
74	1	100	-1.16396e+06	15.3908	0.786876	797	1.03529	5.27849
75	1	100	-1.16454e+06	15.4101	0.786876	788	1.03259	5.33654
76	1	100	-1.16358e+06	15.3166	0.792674	807	1.02939	5.25575
77	1	100	-1.16315e+06	15.3723	0.802491	815	1.02327	5.22661
78	1	100	-1.16274e+06	15.4486	0.807797	782	1.02203	5.22933
79	1	100	-1.16348e+06	15.4484	0.801747	781	1.02358	5.32267
80	1	100	-1.16303e+06	15.3751	0.803674	786	1.0191	5.18598
81	1	100	-1.16204e+06	15.4905	0.812236	785	1.01976	5.08353
82	1	100	-1.16251e+06	15.5615	0.813658	787	1.01494	5.15043
83	1	100	-1.16185e+06	15.5316	0.821603	780	1.01339	5.33452
84	1	100	-1.16159e+06	15.4627	0.820165	786	1.00821	5.24368
85	1	100	-1.16043e+06	15.5469	0.831795	801	1.00596	5.25886
86	1	100	-1.16071e+06	15.565	0.837975	781	1.00457	5.16414
87	1	100	-1.16045e+06	15.6932	0.845868	790	1.00259	5.15163
88	1	100	-1.16067e+06	15.5716	0.850699	792	1.00256	5.06159
89	1	100	-1.1598e+06	15.4823	0.867349	791	0.997138	5.06428
90	1	100	-1.15947e+06	15.4436	0.872186	797	0.994878	5.03143
91	1	100	-1.15922e+06	15.4021	0.880147	802	0.988837	4.99259
92	1	100	-1.15873e+06	15.3838	0.889313	789	0.98664	5.13119
93	1	100	-1.15818e+06	15.379	0.894067	820	0.980951	5.02788
94	1	100	-1.15814e+06	15.4572	0.90961	810	0.983263	5.05148
95	1	100	-1.15758e+06	15.4047	0.926208	821	0.976273	5.10047
96	1	100	-1.15673e+06	15.5161	0.925592	840	0.974356	5.00918
97	1	100	-1.1571e+06	15.6345	0.934804	828	0.973973	5.22609
98	1	100	-1.15639e+06	15.6928	0.948188	825	0.973986	5.14703
99	1	100	-1.15658e+06	15.5881	0.960085	825	0.969144	5.10796
100	1	100	-1.15523e+06	15.5032	0.974121	831	0.966374	5.09004
101	1	100	-1.15582e+06	15.6286	0.975054	832	0.963622	4.86508
102	1	100	-1.15512e+06	15.5143	0.978685	843	0.957477	4.8702
103	1	100	-1.15523e+06	15.6541	0.993754	857	0.960173	4.97913
104	1	100	-1.1551e+06	15.6287	0.993679	848	0.958005	5.05867
105	1	100	-1.15449e+06	15.6598	1.00486	847	0.958175	5.03904
106	1	100	-1.15389e+06	15.661	1.00261	858	0.951459	5.01212
107	1	100	-1.1543e+06	15.8709	1.01504	861	0.951755	5.07557
108	1	100	-1.15425e+06	15.679	1.02819	850	0.955093	4.84396
109	1	100	-1.15388e+06	15.5952	1.02663	853	0.949864	4.79449
110	1	100	-1.15383e+06	15.6122	1.03761	859	0.950594	4.93586
111	1	100	-1.15355e+06	15.7404	1.03916	866	0.94854	4.97643
112	1	100	-1.15345e+06	15.7128	1.03878	877	0.94695	4.98226
113	1	100	-1.15348e+06	15.8675	1.0431	885	0.950751	4.86314
114	1	100	-1.15347e+06	15.6204	1.05892	878	0.947091	4.92262
115	1	100	-1.15289e+06	15.5666	1.06265	868	0.943219	4.86027
116	1	100	-1.15311e+06	15.6469	1.05659	881	0.946317	4.86497
117	1	100	-1.15304e+06	15.7827	1.05861	881	0.944051	4.84677
118	1	100	-1.15249e+06	15.7724	1.05679	858	0.941402	4.74463
119	1	100	-1.15269e+06	15.7267	1.07049	853	0.939689	4.76122
120	1	100	-1.15267e+06	15.8055	1.06773	869	0.939416	4.99387
121	1	100	-1.15219e+06	15.7977	1.07369	860	0.934862	4.96217
122	1	100	-1.15206e+06	15.7643	1.07641	862	0.935254	4.95543
123	1	100	-1.15235e+06	15.7722	1.08412	853	0.93629	4.96742
124	1	100	-1.1524e+06	15.7951	1.09107	859	0.938379	4.9087
125	1	100	-1.1521e+06	15.7357	1.09243	853	0.935357	4.838
126	1	100	-1.15141e+06	15.7609	1.09493	871	0.935039	4.71571
127	1	100	-1.15128e+06	15.8856	1.09295	884	0.936091	4.80439
128	1	100	-1.15199e+06	15.8443	1.07714	882	0.939835	4.79443
129	1	100	-1.15214e+06	15.7357	1.0772	891	0.938008	4.91426
130	1	100	-1.15223e+06	15.835	1.07662	871	0.937424	4.84473
131	1	100	-1.15213e+06	15.7901	1.07857	889	0.936194	4.96489
132	1	100	-1.15174e+06	15.9377	1.08418	890	0.93793	4.82889
133	1	100	-1.15118e+06	15.8364	1.08396	881	0.936572	4.84753
134	1	100	-1.1516e+06	15.8374	1.08702	906	0.933531	4.88754
135	1	100	-1.15141e+06	15.8133	1.08128	884	0.935056	4.89266
136	1	100	-1.15159e+06	15.8332	1.09045	874	0.936335	4.93351
137	1	100	-1.15142e+06	15.7242	1.09338	889	0.935976	4.80978
138	1	100	-1.15178e+06	15.792	1.1047	879	0.936511	4.92427
139	1	100	-1.15156e+06	15.8685	1.10146	874	0.931346	4.81836
140	1	100	-1.15104e+06	15.9807	1.10619	891	0.933802	4.81662
141	1	100	-1.15109e+06	16.0391	1.10921	881	0.931444	4.86599
142	1	100	-1.15048e+06	15.9282	1.10039	890	0.925602	4.8287
143	1	100	-1.15129e+06	15.9598	1.10383	869	0.924025	4.77766
144	1	100	-1.15069e+06	15.9016	1.11339	865	0.926975	4.90479
145	1	100	-1.15152e+06	15.9195	1.12453	861	0.924956	4.89744
146	1	100	-1.15157e+06	15.9676	1.11487	877	0.927209	4.89619
147	1	100	-1.15104e+06	15.9725	1.1153	881	0.930315	4.73287
148	1	100	-1.15121e+06	15.8554	1.11635	872	0.92919	4.79091
149	1	100	-1.15116e+06	15.7743	1.11067	848	0.92889	4.89383
150	1	100	-1.15095e+06	15.89	1.12854	867	0.932483	4.77725
151	1	100	-1.15094e+06	16.0184	1.1167	867	0.930554	4.8734
152	1	100	-1.15076e+06	15.8695	1.12555	863	0.925723	4.9072
153	1	100	-1.15043e+06	16.0188	1.13116	867	0.924111	4.81031
154	1	100	-1.15055e+06	15.8917	1.12443	858	0.924176	4.8583
155	1	100	-1.15081e+06	15.9541	1.11685	849	0.92603	4.88248
156	1	100	-1.15115e+06	15.9858	1.11338	845	0.927537	4.86967
157	1	100	-1.15088e+06	15.9449	1.11485	831	0.926435	4.91469
158	1	100	-1.15086e+06	16.1952	1.10829	845	0.926221	4.80392
159	1	100	-1.15071e+06	16.1375	1.10883	847	0.925118	4.92972
160	1	100	-1.15111e+06	16.1855	1.09697	850	0.928112	4.85236
161	1	100	-1.1515e+06	16.1619	1.10099	854	0.931956	4.84157
162	1	100	-1.15085e+06	15.9875	1.10126	854	0.930825	4.86919
163	1	100	-1.15049e+06	16.031	1.11429	862	0.926613	4.82736
164	1	100	-1.15083e+06	15.9625	1.1137	863	0.924327	4.8781
165	1	100	-1.15045e+06	15.8557	1.11798	864	0.921316	4.82951
166	1	100	-1.15054e+06	15.8814	1.12099	863	0.922046	4.85269
167	1	100	-1.14998e+06	15.9949	1.13255	848	0.920749	4.84886
168	1	100	-1.14986e+06	15.9239	1.12795	868	0.920234	4.96008
169	1	100	-1.15046e+06	15.9579	1.13753	852	0.920344	4.86733
170	1	100	-1.14991e+06	16.0482	1.13539	849	0.922843	4.75677
171	1	100	-1.14992e+06	16.0829	1.13804	849	0.923473	4.89672
172	1	100	-1.15037e+06	16.0447	1.13502	852	0.921719	4.80981
173	1	100	-1.14953e+06	16.0582	1.14207	863	0.919274	4.89539
174	1	100	-1.15081e+06	16.1134	1.14518	875	0.923214	4.85411
175	1	100	-1.15022e+06	16.0049	1.13989	852	0.921498	4.92286
176	1	100	-1.14975e+06	16.0117	1.14451	868	0.91925	4.97327
177	1	100	-1.15014e+06	15.9928	1.14921	896	0.918481	4.80322
178	1	100	-1.15009e+06	16.0734	1.12893	884	0.920107	4.89301
179	1	100	-1.1497e+06	16.1421	1.1293	883	0.92049	4.80982
180	1	100	-1.15053e+06	16.1297	1.13126	891	0.922322	4.85413
181	1	100	-1.15011e+06	16.0129	1.13701	892	0.927603	4.8446
182	1	100	-1.15001e+06	15.9598	1.13724	871	0.92298	4.92042
183	1	100	-1.14986e+06	15.9864	1.14769	901	0.920932	4.91729
184	1	100	-1.15013e+06	16.0675	1.14079	888	0.922265	4.84673
185	1	100	-1.15012e+06	15.9545	1.14235	904	0.922213	4.74332
186	1	100	-1.14941e+06	15.8997	1.15057	897	0.918886	4.77021
187	1	100	-1.15004e+06	15.9766	1.14703	893	0.918268	4.84605
188	1	100	-1.1496e+06	16.0772	1.1412	888	0.919397	4.88154
189	1	100	-1.1495e+06	16.1967	1.13701	889	0.92265	4.766
190	1	100	-1.14953e+06	15.9319	1.14185	879	0.921079	4.66354
191	1	100	-1.14961e+06	16.0392	1.13975	901	0.921643	4.74181
192	1	100	-1.14942e+06	16.1485	1.14073	896	0.918259	4.85246
193	1	100	-1.15015e+06	16.1834	1.14762	888	0.921942	4.77361
194	1	100	-1.14924e+06	16.0862	1.1372	898	0.918101	4.80587
195	1	100	-1.14981e+06	16.138	1.14108	898	0.917267	4.9287
196	1	100	-1.14942e+06	16.3253	1.1394	886	0.920088	4.87126
197	1	100	-1.15001e+06	16.2399	1.14252	884	0.91658	4.79268
198	1	100	-1.14902e+06	16.1905	1.14306	899	0.916912	4.7234
199	1	100	-1.15e+06	16.2405	1.12484	891	0.919779	4.83481
200	1	100	-1.1496e+06	16.1972	1.12761	899	0.919483	4.88035
201	1	100	-1.15033e+06	16.206	1.117	880	0.926088	4.88992
202	1	100	-1.14977e+06	16.0725	1.1214	899	0.919037	4.79578
203	1	100	-1.15001e+06	16.3735	1.11078	915	0.922232	4.80013
204	1	100	-1.15027e+06	16.2972	1.11552	918	0.920614	4.76802
205	1	100	-1.15004e+06	16.2161	1.12218	908	0.922406	4.75186
206	1	100	-1.15001e+06	16.088	1.12692	894	0.920297	4.73702
207	1	100	-1.14983e+06	16.1268	1.11642	901	0.919628	4.73475
208	1	100	-1.14974e+06	16.2619	1.10219	900	0.918877	4.80001
209	1	100	-1.15019e+06	16.2545	1.11234	899	0.92066	4.68927
210	1	100	-1.14925e+06	16.176	1.11995	907	0.919741	4.62734
211	1	100	-1.14961e+06	16.0544	1.13511	882	0.920766	4.75034
212	1	100	-1.14929e+06	16.2084	1.12614	900	0.923548	4.71114
213	1	100	-1.1496e+06	16.1672	1.1146	910	0.918669	4.73306
214	1	100	-1.14884e+06	16.103	1.1223	909	0.921768	4.65048
215	1	100	-1.1486e+06	16.1039	1.12317	904	0.916119	4.66026
216	1	100	-1.14891e+06	16.0861	1.11249	917	0.919354	4.6906
217	1	100	-1.14921e+06	16.1156	1.12018	912	0.919755	4.63099
218	1	100	-1.14943e+06	16.1133	1.12503	902	0.916565	4.74965
219	1	100	-1.14861e+06	16.2755	1.12674	903	0.920848	4.82486
220	1	100	-1.14915e+06	16.151	1.12622	891	0.919939	4.7765
221	1	100	-1.14889e+06	16.2012	1.13276	923	0.916696	4.71155
222	1	100	-1.14913e+06	16.2099	1.12868	927	0.921294	4.69203
223	1	100	-1.14852e+06	16.1106	1.11497	916	0.919262	4.61657
224	1	100	-1.14901e+06	16.1434	1.11375	920	0.919019	4.69146
225	1	100	-1.14848e+06	16.1177	1.12708	908	0.918044	4.75974
226	1	100	-1.14877e+06	16.0106	1.13538	914	0.91936	4.75873
227	1	100	-1.14917e+06	16.1284	1.13116	903	0.922772	4.7619
228	1	100	-1.14953e+06	16.0454	1.12627	906	0.920572	4.96019
229	1	100	-1.14986e+06	15.9054	1.12904	913	0.921087	4.95517
230	1	100	-1.14892e+06	16.1095	1.13094	933	0.919362	4.82421
231	1	100	-1.14834e+06	16.2362	1.13484	914	0.918205	4.71875
232	1	100	-1.14861e+06	16.2042	1.14386	913	0.914062	4.63571
233	1	100	-1.14866e+06	16.1938	1.14189	921	0.912819	4.71826
234	1	100	-1.14868e+06	16.0724	1.14874	925	0.915656	4.81007
235	1	100	-1.14861e+06	16.1582	1.14712	937	0.916038	4.79377
236	1	100	-1.14852e+06	16.157	1.14284	929	0.915302	4.70565
237	1	100	-1.14862e+06	16.2661	1.13624	918	0.916074	4.77011
238	1	100	-1.14894e+06	16.138	1.12635	918	0.914033	4.79334
239	1	100	-1.14873e+06	16.2271	1.12275	922	0.915936	4.69859
240	1	100	-1.1493e+06	16.2859	1.12165	920	0.917098	4.71348
241	1	100	-1.1492e+06	16.2905	1.13767	912	0.918637	4.7619
242	1	100	-1.14851e+06	16.1919	1.14067	896	0.916899	4.75658
243	1	100	-1.14891e+06	16.1177	1.14532	902	0.915742	4.82092
244	1	100	-1.14838e+06	16.2002	1.15636	889	0.913504	4.78799
245	1	100	-1.14876e+06	16.2515	1.15819	898	0.915987	4.76612
246	1	100	-1.14835e+06	16.1142	1.14655	900	0.91351	4.67426
247	1	100	-1.14823e+06	16.1314	1.13917	918	0.914282	4.82729
248	1	100	-1.14889e+06	16.2113	1.14607	920	0.91593	4.75618
249	1	100	-1.14886e+06	16.1173	1.13558	915	0.9151	4.7611
250	1	100	-1.14902e+06	16.1764	1.14664	902	0.917157	4.70004
251	1	100	-1.14897e+06	16.2134	1.14323	904	0.915423	4.76871
252	1	100	-1.14941e+06	16.0349	1.14996	906	0.916506	4.77231
253	1	100	-1.14872e+06	15.9894	1.14928	910	0.915391	4.78107
254	1	100	-1.14919e+06	16.068	1.15005	911	0.914227	4.7209
255	1	100	-1.14942e+06	16.1178	1.13634	906	0.918152	4.79539
256	1	100	-1.14945e+06	15.9613	1.145	924	0.914723	4.73919
257	1	100	-1.14903e+06	16.0131	1.15105	901	0.910801	4.77618
258	1	100	-1.14892e+06	16.0388	1.14323	908	0.916933	4.66391
259	1	100	-1.1488e+06	16.0669	1.14903	917	0.913983	4.84032
260	1	100	-1.14887e+06	16.1307	1.15785	910	0.917591	4.71143
261	1	100	-1.14836e+06	16.1486	1.15432	914	0.913195	4.71645
262	1	100	-1.14876e+06	16.3412	1.14739	938	0.915318	4.74956
263	1	100	-1.14892e+06	16.3822	1.13564	922	0.915031	4.73325
264	1	100	-1.14933e+06	16.2218	1.14476	935	0.916064	4.7719
265	1	100	-1.14862e+06	16.1422	1.15295	919	0.914094	4.79475
266	1	100	-1.14918e+06	16.3131	1.13186	905	0.919313	4.85119
267	1	100	-1.14977e+06	16.1905	1.1292	909	0.920439	4.86454
268	1	100	-1.14857e+06	16.1731	1.13378	915	0.916609	4.78843
269	1	100	-1.1488e+06	16.1035	1.12508	891	0.917843	4.6321
270	1	100	-1.14853e+06	16.1263	1.12682	916	0.916084	4.66673
271	1	100	-1.1489e+06	16.069	1.125	931	0.919043	4.72641
272	1	100	-1.1492e+06	16.1276	1.13028	915	0.918467	4.73462
273	1	100	-1.14867e+06	16.0499	1.12512	926	0.920751	4.63711
274	1	100	-1.14886e+06	16.0517	1.1238	923	0.920499	4.70807
275	1	100	-1.14902e+06	16.0871	1.12281	924	0.923663	4.7286
276	1	100	-1.14977e+06	16.0711	1.11689	911	0.921748	4.75051
277	1	100	-1.14948e+06	16.1713	1.10555	918	0.926393	4.65788
278	1	100	-1.14951e+06	16.1351	1.11267	928	0.928285	4.71659
279	1	100	-1.14937e+06	15.9537	1.11092	900	0.927029	4.68876
280	1	100	-1.14948e+06	15.8827	1.10628	910	0.923464	4.67667
281	1	100	-1.15005e+06	16.0405	1.10601	917	0.928308	4.58651
282	1	100	-1.14964e+06	16.026	1.1085	911	0.925119	4.63755
283	1	100	-1.14979e+06	16.0276	1.10762	896	0.927569	4.50234
284	1	100	-1.14996e+06	16.042	1.10539	896	0.922592	4.57206
285	1	100	-1.14954e+06	16.0193	1.10637	904	0.921011	4.64962
286	1	100	-1.14955e+06	16.1123	1.08527	902	0.927894	4.6285
287	1	100	-1.14977e+06	16.1859	1.09345	909	0.928527	4.63238
288	1	100	-1.14998e+06	16.2011	1.1061	906	0.926977	4.57001
289	1	100	-1.14971e+06	15.9594	1.11963	917	0.92551	4.64742
290	1	100	-1.14948e+06	15.9751	1.12495	915	0.923553	4.72824
291	1	100	-1.14933e+06	15.9349	1.12246	936	0.921507	4.60328
292	1	100	-1.14928e+06	16.0182	1.12367	926	0.922169	4.69784
293	1	100	-1.14931e+06	16.0497	1.12641	913	0.924053	4.70452
294	1	100	-1.14956e+06	16.0147	1.1246	929	0.923949	4.57105
295	1	100	-1.14913e+06	16.0689	1.12677	925	0.922399	4.69392
296	1	100	-1.14961e+06	15.9966	1.1231	905	0.921426	4.67921
297	1	100	-1.14945e+06	16.1039	1.12421	900	0.922917	4.81342
298	1	100	-1.14908e+06	15.907	1.13663	922	0.918356	4.74967
299	1	100	-1.14949e+06	15.872	1.14367	913	0.917292	4.64718
300	1	100	-1.14938e+06	15.8813	1.14162	914	0.917861	4.74792
301	1	100	-1.149e+06	16.0378	1.14957	912	0.915803	4.79976
302	1	100	-1.14931e+06	16.2088	1.15317	903	0.916882	4.75321
303	1	100	-1.1488e+06	16.2068	1.14288	888	0.921228	4.68489
304	1	100	-1.14889e+06	16.1945	1.14022	912	0.920431	4.76151
305	1	100	-1.14913e+06	16.1444	1.1435	887	0.918658	4.7979
306	1	100	-1.14937e+06	16.1417	1.1378	893	0.918006	4.76369
307	1	100	-1.14935e+06	16.098	1.13731	881	0.915352	4.6731
308	1	100	-1.14891e+06	16.0633	1.15099	899	0.918396	4.8062
309	1	100	-1.1488e+06	16.1301	1.14982	883	0.917751	4.66563
310	1	100	-1.14947e+06	16.2472	1.14269	882	0.92151	4.68443
311	1	100	-1.14917e+06	16.1587	1.14293	898	0.917598	4.70917
312	1	100	-1.14934e+06	16.1856	1.13716	895	0.9184	4.77539
313	1	100	-1.14948e+06	16.2537	1.13368	903	0.919148	4.81118
314	1	100	-1.14932e+06	16.2758	1.13473	895	0.920249	4.80317
315	1	100	-1.14902e+06	16.1866	1.13369	922	0.917447	4.73691
316	1	100	-1.14901e+06	16.2447	1.12883	897	0.92123	4.75705
317	1	100	-1.14957e+06	16.1587	1.12543	904	0.92444	4.72538
318	1	100	-1.14889e+06	16.0331	1.12345	909	0.920564	4.81184
319	1	100	-1.14977e+06	16.1303	1.12429	912	0.922914	4.76317
320	1	100	-1.14944e+06	16.1003	1.12497	912	0.921711	4.71769
321	1	100	-1.14929e+06	16.0678	1.13231	919	0.922307	4.63755
322	1	100	-1.14933e+06	16.0839	1.13971	909	0.919974	4.81797
323	1	100	-1.14908e+06	16.0084	1.14401	917	0.91954	4.78047
324	1	100	-1.14947e+06	15.9726	1.13996	908	0.921168	4.7162
325	1	100	-1.14913e+06	16.0932	1.13999	899	0.921898	4.76692
326	1	100	-1.14943e+06	16.0812	1.14033	906	0.921369	4.75093
327	1	100	-1.14886e+06	16.078	1.1451	900	0.918624	4.73316
328	1	100	-1.14909e+06	16.0008	1.1415	896	0.916431	4.68004
329	1	100	-1.1487e+06	16.0856	1.15513	896	0.920084	4.64725
330	1	100	-1.14828e+06	16.0686	1.16412	906	0.914739	4.67327
331	1	100	-1.14806e+06	16.088	1.14944	910	0.917959	4.61218
332	1	100	-1.14834e+06	16.0037	1.14725	889	0.913442	4.75588
333	1	100	-1.14917e+06	16.162	1.12986	906	0.921367	4.74668
334	1	100	-1.14877e+06	16.0957	1.12635	915	0.918202	4.73245
335	1	100	-1.14879e+06	16.0094	1.13831	888	0.92025	4.61124
336	1	100	-1.14894e+06	16.02	1.13908	898	0.917868	4.66614
337	1	100	-1.14861e+06	16.0302	1.13717	901	0.914945	4.6304
338	1	100	-1.14874e+06	16.2153	1.12973	901	0.919744	4.71168
339	1	100	-1.14931e+06	16.1134	1.12846	898	0.921086	4.63335
340	1	100	-1.14904e+06	16.2807	1.12135	928	0.917466	4.75959
341	1	100	-1.14866e+06	16.0252	1.11947	924	0.916937	4.71884
342	1	100	-1.14872e+06	16.0195	1.13056	923	0.920082	4.67399
343	1	100	-1.14935e+06	15.9643	1.12506	911	0.921128	4.67363
344	1	100	-1.14879e+06	16.0761	1.12919	923	0.917971	4.80383
345	1	100	-1.14895e+06	16.2375	1.13442	925	0.920672	4.79995
346	1	100	-1.14967e+06	16.0801	1.13107	918	0.924225	4.78413
347	1	100	-1.14904e+06	16.0983	1.13393	923	0.920289	4.76359
348	1	100	-1.14864e+06	16.0603	1.1341	910	0.919352	4.71999
349	1	100	-1.1489e+06	15.9277	1.13626	919	0.919168	4.67784
350	1	100	-1.14836e+06	16.0193	1.14044	904	0.914776	4.66587
351	1	100	-1.14836e+06	16.0347	1.12383	927	0.917009	4.71787
352	1	100	-1.14816e+06	16.1879	1.12541	944	0.918019	4.69854
353	1	100	-1.14776e+06	16.1398	1.12804	929	0.913057	4.68112
354	1	100	-1.14809e+06	16.2896	1.13046	936	0.918115	4.63874
355	1	100	-1.14779e+06	16.1765	1.12775	925	0.913567	4.66548
356	1	100	-1.14778e+06	16.3623	1.12786	943	0.915531	4.7258
357	1	100	-1.14738e+06	16.2999	1.13606	944	0.913446	4.68088
358	1	100	-1.14784e+06	16.3835	1.13642	932	0.91734	4.58022
359	1	100	-1.14797e+06	16.3552	1.12757	924	0.916056	4.73787
360	1	100	-1.14786e+06	16.2596	1.13359	934	0.914915	4.58168
361	1	100	-1.14839e+06	16.292	1.13857	931	0.915496	4.67797
362	1	100	-1.14797e+06	16.2437	1.1474	932	0.914805	4.56002
363	1	100	-1.14833e+06	16.2622	1.15812	932	0.910859	4.587
364	1	100	-1.14795e+06	16.261	1.16244	904	0.909816	4.59806
365	1	100	-1.14783e+06	16.1419	1.16795	921	0.910375	4.64306
366	1	100	-1.14795e+06	16.1638	1.1636	916	0.913128	4.76785
367	1	100	-1.14785e+06	16.0774	1.16624	921	0.913222	4.61649
368	1	100	-1.14831e+06	15.9773	1.17257	920	0.910992	4.73126
369	1	100	-1.14833e+06	16.169	1.17079	919	0.910286	4.66261
370	1	100	-1.14762e+06	16.1231	1.17368	906	0.910516	4.68201
371	1	100	-1.14771e+06	16.1812	1.16592	916	0.9116	4.65978
372	1	100	-1.14798e+06	16.2246	1.16139	913	0.909189	4.58187
373	1	100	-1.14751e+06	16.4242	1.16282	924	0.907565	4.63365
374	1	100	-1.14859e+06	16.311	1.1547	922	0.911086	4.60076
375	1	100	-1.14848e+06	16.2489	1.15598	901	0.915001	4.76042
376	1	100	-1.14827e+06	16.1971	1.15116	924	0.915489	4.69659
377	1	100	-1.14823e+06	16.2671	1.15042	911	0.912463	4.54181
378	1	100	-1.1488e+06	16.2742	1.15721	910	0.913742	4.53888
379	1	100	-1.14844e+06	16.1903	1.14554	923	0.917563	4.50831
380	1	100	-1.14818e+06	16.1642	1.1464	927	0.914156	4.59745
381	1	100	-1.14856e+06	16.191	1.14779	938	0.916631	4.47342
382	1	100	-1.14815e+06	16.1488	1.15179	928	0.915704	4.48516
383	1	100	-1.14837e+06	16.1492	1.14126	932	0.915908	4.40896
384	1	100	-1.14778e+06	16.1224	1.15019	941	0.914306	4.49896
385	1	100	-1.14892e+06	16.0627	1.13071	942	0.915769	4.56695
386	1	100	-1.1486e+06	16.1655	1.1245	932	0.918026	4.61833
387	1	100	-1.14839e+06	16.2085	1.13084	931	0.919707	4.62161
388	1	100	-1.14884e+06	16.1702	1.13248	927	0.918767	4.52912
389	1	100	-1.1484e+06	16.1545	1.14264	934	0.918845	4.51609
390	1	100	-1.14879e+06	16.1149	1.13407	920	0.919921	4.51715
391	1	100	-1.14877e+06	16.0858	1.12585	922	0.918397	4.50213
392	1	100	-1.14866e+06	16.1831	1.13308	933	0.918851	4.58219
393	1	100	-1.14851e+06	16.1139	1.1348	929	0.919442	4.54848
394	1	100	-1.14818e+06	16.1769	1.12786	917	0.91921	4.49928
395	1	100	-1.14846e+06	16.1703	1.1301	938	0.920284	4.52569
396	1	100	-1.14798e+06	16.1573	1.12794	927	0.915958	4.45293
397	1	100	-1.14854e+06	16.0427	1.12942	932	0.914865	4.5097
398	1	100	-1.14818e+06	16.1106	1.1348	945	0.913799	4.59731
399	1	100	-1.14795e+06	16.1431	1.1394	921	0.91301	4.57706
400	1	100	-1.14793e+06	16.2027	1.1204	923	0.916353	4.67151
401	1	100	-1.14864e+06	16.2023	1.13067	930	0.917436	4.67291
402	1	100	-1.14808e+06	16.1066	1.13243	929	0.914791	4.54451
403	1	100	-1.14768e+06	16.2326	1.1311	927	0.913511	4.58222
404	1	100	-1.14761e+06	16.2083	1.12632	923	0.912259	4.53941
405	1	100	-1.14809e+06	16.1492	1.13944	919	0.910909	4.61612
406	1	100	-1.14736e+06	16.362	1.14087	919	0.913103	4.54383
407	1	100	-1.14811e+06	16.2304	1.14419	917	0.913111	4.55854
408	1	100	-1.14758e+06	16.3077	1.13895	923	0.911633	4.52068
409	1	100	-1.14776e+06	16.1935	1.14119	935	0.912297	4.48144
410	1	100	-1.14766e+06	16.1624	1.14297	941	0.910429	4.53679
411	1	100	-1.14827e+06	16.1852	1.13725	933	0.916333	4.55793
412	1	100	-1.14798e+06	16.223	1.12866	929	0.912724	4.56458
413	1	100	-1.14848e+06	16.2733	1.13376	920	0.914142	4.56939
414	1	100	-1.14846e+06	16.2462	1.14185	921	0.914068	4.58025
415	1	100	-1.14868e+06	16.277	1.12909	909	0.918093	4.61882
416	1	100	-1.14808e+06	16.1436	1.12724	917	0.915818	4.48789
417	1	100	-1.14903e+06	16.2252	1.12724	924	0.919617	4.53118
418	1	100	-1.14899e+06	16.1999	1.12581	913	0.919328	4.67435
419	1	100	-1.14826e+06	16.2946	1.12532	905	0.918535	4.67474
420	1	100	-1.14899e+06	16.3129	1.12467	916	0.920955	4.78971
421	1	100	-1.14888e+06	16.2443	1.12122	889	0.921401	4.69984
422	1	100	-1.1484e+06	16.2165	1.11465	913	0.918504	4.59019
423	1	100	-1.14819e+06	16.2298	1.11621	920	0.915248	4.63122
424	1	100	-1.14832e+06	16.3146	1.12623	919	0.918324	4.53207
425	1	100	-1.14865e+06	16.339	1.12526	916	0.920213	4.42798
426	1	100	-1.14843e+06	16.27	1.12484	916	0.918515	4.4982
427	1	100	-1.1485e+06	16.3239	1.12028	913	0.918595	4.54103
428	1	100	-1.1483e+06	16.2871	1.11474	910	0.918346	4.55093
429	1	100	-1.14836e+06	16.4188	1.10475	929	0.92074	4.65061
430	1	100	-1.14877e+06	16.2274	1.11525	930	0.919427	4.5328
431	1	100	-1.14821e+06	16.2526	1.12133	908	0.914352	4.51235
432	1	100	-1.14812e+06	16.4421	1.12656	909	0.916969	4.50725
433	1	100	-1.14854e+06	16.2851	1.1192	907	0.919174	4.49707
434	1	100	-1.14819e+06	16.2424	1.12906	923	0.915043	4.54116
435	1	100	-1.14815e+06	16.3021	1.14323	902	0.91609	4.44428
436	1	100	-1.14831e+06	16.1552	1.15116	899	0.914245	4.4533
437	1	100	-1.14855e+06	16.1671	1.15327	921	0.915256	4.54015
438	1	100	-1.14805e+06	16.1175	1.14594	925	0.913852	4.50967
439	1	100	-1.14795e+06	16.2358	1.14265	922	0.916132	4.58504
440	1	100	-1.14849e+06	16.2231	1.14261	911	0.915676	4.49738
441	1	100	-1.14836e+06	16.3189	1.12959	906	0.915825	4.50058
442	1	100	-1.14807e+06	16.1882	1.12805	920	0.917986	4.41914
443	1	100	-1.14852e+06	16.1337	1.12216	916	0.921021	4.51096
444	1	100	-1.14854e+06	16.1076	1.12671	913	0.916972	4.51959
445	1	100	-1.14829e+06	16.1922	1.12571	919	0.91708	4.5351
446	1	100	-1.14856e+06	16.163	1.1165	923	0.917155	4.43154
447	1	100	-1.14829e+06	16.2693	1.10856	916	0.917525	4.53554
448	1	100	-1.14864e+06	16.3591	1.116	915	0.91695	4.55182
449	1	100	-1.1486e+06	16.4725	1.11438	914	0.918645	4.61105
450	1	100	-1.14828e+06	16.3727	1.1348	916	0.916818	4.60339
451	1	100	-1.14797e+06	16.5511	1.13497	911	0.914363	4.5529
452	1	100	-1.14737e+06	16.4365	1.14635	902	0.908346	4.50504
453	1	100	-1.14768e+06	16.5245	1.14428	924	0.91398	4.48137
454	1	100	-1.14819e+06	16.5128	1.13531	933	0.918068	4.58517
455	1	100	-1.14857e+06	16.4803	1.12093	913	0.917858	4.54379
456	1	100	-1.14782e+06	16.4394	1.11007	915	0.913433	4.54685
457	1	100	-1.14841e+06	16.4827	1.11718	902	0.915291	4.62914
458	1	100	-1.14835e+06	16.3438	1.11705	916	0.921564	4.60664
459	1	100	-1.14845e+06	16.2697	1.12224	912	0.917898	4.53624
460	1	100	-1.14909e+06	16.1994	1.12066	933	0.920709	4.59199
461	1	100	-1.14917e+06	16.2103	1.12703	920	0.919269	4.70157
462	1	100	-1.14847e+06	16.3316	1.12952	925	0.919132	4.58092
463	1	100	-1.14877e+06	16.1978	1.12865	914	0.916664	4.69964
464	1	100	-1.14885e+06	16.2926	1.14084	915	0.915988	4.66607
465	1	100	-1.14828e+06	16.3616	1.1359	914	0.918316	4.58845
466	1	100	-1.14863e+06	16.3931	1.1244	923	0.918121	4.52699
467	1	100	-1.14837e+06	16.3426	1.13788	904	0.916051	4.61563
468	1	100	-1.14892e+06	16.1835	1.13214	902	0.917253	4.64836
469	1	100	-1.14906e+06	16.1902	1.12583	906	0.916473	4.75836
470	1	100	-1.14878e+06	16.0526	1.12061	921	0.914645	4.70564
471	1	100	-1.14911e+06	16.1068	1.1198	923	0.919025	4.65463
472	1	100	-1.14913e+06	16.2076	1.12485	918	0.917175	4.63802
473	1	100	-1.14883e+06	16.1986	1.13122	928	0.91584	4.57914
474	1	100	-1.14843e+06	16.2804	1.1363	910	0.916347	4.64518
475	1	100	-1.14872e+06	16.318	1.13263	923	0.915451	4.52813
476	1	100	-1.14818e+06	16.169	1.14453	898	0.913187	4.53995
477	1	100	-1.14832e+06	16.2171	1.14297	926	0.917926	4.52047
478	1	100	-1.1483e+06	16.1089	1.13551	924	0.912535	4.69735
479	1	100	-1.14795e+06	16.1581	1.12938	925	0.912241	4.72085
480	1	100	-1.14816e+06	16.1929	1.12469	903	0.917389	4.71809
481	1	100	-1.14828e+06	16.2797	1.1243	907	0.916162	4.59802
482	1	100	-1.14796e+06	16.234	1.14244	915	0.916326	4.62389
483	1	100	-1.14838e+06	16.2205	1.14237	912	0.914447	4.54163
484	1	100	-1.14844e+06	16.1013	1.14992	908	0.914509	4.602
485	1	100	-1.1482e+06	16.12	1.13844	893	0.915341	4.60431
486	1	100	-1.14787e+06	16.1999	1.13145	901	0.913351	4.54927
487	1	100	-1.14795e+06	16.1374	1.13633	895	0.912811	4.52071
488	1	100	-1.14832e+06	16.2135	1.14645	889	0.910375	4.50408
489	1	100	-1.14761e+06	16.2144	1.15077	900	0.909745	4.55475
490	1	100	-1.14827e+06	16.2153	1.14292	907	0.916226	4.54988
491	1	100	-1.14778e+06	16.0877	1.14129	903	0.912032	4.43472
492	1	100	-1.14804e+06	16.0484	1.14814	879	0.91183	4.57056
493	1	100	-1.1481e+06	15.9851	1.15307	912	0.912008	4.674
494	1	100	-1.14792e+06	16.048	1.14046	907	0.913503	4.59309
495	1	100	-1.14834e+06	15.9886	1.14244	881	0.915675	4.55378
496	1	100	-1.14877e+06	16.0869	1.13454	882	0.916748	4.55766
497	1	100	-1.14814e+06	16.0404	1.14663	911	0.915635	4.54794
498	1	100	-1.14776e+06	16.2414	1.14299	905	0.916647	4.59982
499	1	100	-1.14864e+06	16.31	1.13995	915	0.916481	4.47522
500	1	100	-1.14862e+06	16.3003	1.1341	918	0.920804	4.55511
501	1	100	-1.14853e+06	16.222	1.13389	896	0.920304	4.517
502	1	100	-1.14848e+06	16.1067	1.12459	889	0.91929	4.54255
503	1	100	-1.14829e+06	16.1923	1.13229	903	0.917717	4.54225
504	1	100	-1.148e+06	16.1725	1.12396	900	0.916846	4.55146
505	1	100	-1.14878e+06	16.1833	1.12896	903	0.920297	4.64713
506	1	100	-1.14834e+06	16.1934	1.12454	908	0.918912	4.63225
507	1	100	-1.14879e+06	16.2332	1.12321	905	0.918151	4.60272
508	1	100	-1.14864e+06	16.1844	1.12999	898	0.917501	4.60421
509	1	100	-1.14866e+06	16.3487	1.13138	879	0.917472	4.58729
510	1	100	-1.1483e+06	16.315	1.13356	884	0.915286	4.61134
511	1	100	-1.14823e+06	16.2247	1.12686	876	0.914596	4.5831
512	1	100	-1.14828e+06	16.2432	1.12419	891	0.917228	4.60702
513	1	100	-1.14905e+06	16.281	1.11799	907	0.915336	4.58054
514	1	100	-1.14855e+06	16.172	1.11765	882	0.916052	4.50103
515	1	100	-1.14895e+06	16.2058	1.12399	861	0.918566	4.59509
516	1	100	-1.14887e+06	16.2737	1.12747	894	0.919274	4.66449
517	1	100	-1.14909e+06	16.261	1.11921	883	0.920668	4.38551
518	1	100	-1.14944e+06	16.073	1.12282	879	0.922003	4.59889
519	1	100	-1.14831e+06	16.1093	1.13098	869	0.919317	4.61144
520	1	100	-1.14891e+06	16.0568	1.13447	886	0.920942	4.60751
521	1	100	-1.1491e+06	15.9174	1.13575	891	0.918941	4.56743
522	1	100	-1.1492e+06	16.0241	1.13039	898	0.920988	4.53434
523	1	100	-1.14924e+06	16.0797	1.11513	893	0.920643	4.6376
524	1	100	-1.14818e+06	16.1322	1.1098	873	0.915725	4.6418
525	1	100	-1.14847e+06	16.1631	1.11729	894	0.919338	4.58825
526	1	100	-1.14831e+06	16.1175	1.12101	901	0.919691	4.53069
527	1	100	-1.14793e+06	16.0432	1.11597	905	0.918003	4.56793
528	1	100	-1.14919e+06	16.1051	1.10733	906	0.921442	4.68528
529	1	100	-1.14925e+06	16.1068	1.11362	907	0.922159	4.6146
530	1	100	-1.14876e+06	15.8301	1.11296	913	0.918732	4.67153
531	1	100	-1.14896e+06	15.9731	1.12257	908	0.924152	4.63791
532	1	100	-1.14891e+06	15.9489	1.12116	918	0.922932	4.62639
533	1	100	-1.14905e+06	15.9716	1.12396	898	0.924539	4.59574
534	1	100	-1.14893e+06	16.0028	1.11718	893	0.9198	4.70737
535	1	100	-1.14932e+06	16.0169	1.11484	899	0.921074	4.55765
536	1	100	-1.14895e+06	16.1353	1.11664	885	0.920136	4.50997
537	1	100	-1.14943e+06	16.079	1.11174	896	0.92302	4.59726
538	1	100	-1.14851e+06	16.1611	1.12408	913	0.919672	4.60908
539	1	100	-1.14803e+06	16.0588	1.12166	910	0.916222	4.49545
540	1	100	-1.14813e+06	16.0139	1.1319	912	0.911457	4.58131
541	1	100	-1.149e+06	16.2428	1.12872	908	0.920568	4.58478
542	1	100	-1.14817e+06	16.1668	1.12902	925	0.918119	4.68809
543	1	100	-1.14814e+06	16.1753	1.13713	914	0.915198	4.68994
544	1	100	-1.14834e+06	16.2815	1.12612	943	0.916929	4.6527
545	1	100	-1.14814e+06	16.0029	1.12972	923	0.915385	4.62751
546	1	100	-1.14828e+06	16.0371	1.15182	934	0.913023	4.66276
547	1	100	-1.14816e+06	16.2495	1.14449	915	0.915463	4.69678
548	1	100	-1.14874e+06	16.2755	1.1447	914	0.916809	4.71943
549	1	100	-1.14877e+06	16.2287	1.14771	920	0.911271	4.63263
550	1	100	-1.14812e+06	16.2215	1.15071	928	0.912992	4.67669
551	1	100	-1.14809e+06	16.1839	1.14294	911	0.914137	4.65345
552	1	100	-1.14862e+06	16.3652	1.1306	893	0.919708	4.65635
553	1	100	-1.14805e+06	16.1488	1.11342	909	0.916142	4.63531
554	1	100	-1.14941e+06	16.253	1.11312	897	0.919919	4.69464
555	1	100	-1.14911e+06	16.2381	1.11707	883	0.921137	4.80366
556	1	100	-1.149e+06	16.2015	1.12269	881	0.919984	4.74469
557	1	100	-1.14877e+06	16.1526	1.11473	895	0.919952	4.68467
558	1	100	-1.1493e+06	16.1367	1.11052	880	0.919019	4.54401
559	1	100	-1.1487e+06	16.1274	1.12673	913	0.915925	4.745
560	1	100	-1.14909e+06	16.2296	1.13145	902	0.917703	4.68876
561	1	100	-1.14942e+06	16.2375	1.12678	892	0.915735	4.56675
562	1	100	-1.14922e+06	16.284	1.11551	913	0.9219	4.62082
563	1	100	-1.14887e+06	16.3266	1.10274	912	0.922012	4.66966
564	1	100	-1.14923e+06	16.2478	1.10408	922	0.920448	4.63765
565	1	100	-1.14898e+06	16.2008	1.10534	932	0.917648	4.51639
566	1	100	-1.14848e+06	16.1058	1.10902	906	0.919023	4.63938
567	1	100	-1.14917e+06	16.0887	1.11076	919	0.92058	4.61268
568	1	100	-1.1488e+06	16.1858	1.10525	913	0.923421	4.61862
569	1	100	-1.14893e+06	16.0962	1.09913	922	0.921478	4.60694
570	1	100	-1.14896e+06	16.1762	1.10215	919	0.919314	4.5335
571	1	100	-1.1485e+06	16.2344	1.10863	919	0.919952	4.54053
572	1	100	-1.14841e+06	16.3468	1.11145	912	0.92049	4.60166
573	1	100	-1.14875e+06	16.1546	1.11787	917	0.919321	4.68876
574	1	100	-1.14871e+06	16.1568	1.10875	919	0.920936	4.75493
575	1	100	-1.14867e+06	16.2465	1.11374	926	0.917899	4.53157
576	1	100	-1.14904e+06	16.2613	1.11489	902	0.917814	4.65547
577	1	100	-1.149e+06	16.1568	1.11561	879	0.918582	4.65004
578	1	100	-1.14842e+06	16.2686	1.11121	902	0.919081	4.7393
579	1	100	-1.1489e+06	16.1194	1.11188	895	0.917682	4.69256
580	1	100	-1.14853e+06	16.0669	1.11585	897	0.918695	4.67173
581	1	100	-1.14889e+06	16.159	1.12042	901	0.921082	4.5355
582	1	100	-1.14863e+06	16.1101	1.12182	906	0.918642	4.6512
583	1	100	-1.14911e+06	16.1251	1.12935	912	0.921058	4.7249
584	1	100	-1.14872e+06	16.1904	1.12509	907	0.919471	4.65172
585	1	100	-1.14856e+06	16.2369	1.12758	908	0.920497	4.58077
586	1	100	-1.14838e+06	16.1649	1.12583	906	0.918836	4.62332
587	1	100	-1.14829e+06	16.1407	1.1254	902	0.918723	4.52696
588	1	100	-1.14801e+06	16.1264	1.13657	897	0.91719	4.66616
589	1	100	-1.14813e+06	16.188	1.14677	877	0.914627	4.59052
590	1	100	-1.14825e+06	16.1234	1.1351	889	0.915605	4.58592
591	1	100	-1.14832e+06	16.0343	1.13856	885	0.914322	4.59927
592	1	100	-1.14858e+06	16.2023	1.13488	899	0.915022	4.59141
593	1	100	-1.14868e+06	16.3639	1.12506	900	0.915385	4.63787
594	1	100	-1.14911e+06	16.3607	1.12794	884	0.916354	4.6811
595	1	100	-1.14862e+06	16.3589	1.12421	888	0.914601	4.62947
596	1	100	-1.14875e+06	16.327	1.13157	883	0.91252	4.6087
597	1	100	-1.14866e+06	16.4062	1.14452	902	0.916494	4.63024
598	1	100	-1.14828e+06	16.2583	1.13562	885	0.91124	4.71648
599	1	100	-1.14799e+06	16.2699	1.13447	905	0.911081	4.70982
600	1	100	-1.14841e+06	16.2069	1.12995	913	0.912978	4.65818
601	1	100	-1.14838e+06	16.2965	1.13297	900	0.915219	4.67326
602	1	100	-1.14804e+06	16.3221	1.13932	896	0.914611	4.60804
603	1	100	-1.14851e+06	16.3347	1.12597	908	0.915188	4.52133
604	1	100	-1.14775e+06	16.4245	1.13114	921	0.915601	4.60361
605	1	100	-1.14863e+06	16.3466	1.13006	918	0.918541	4.59125
606	1	100	-1.14832e+06	16.3388	1.1247	904	0.918729	4.74355
607	1	100	-1.14847e+06	16.0574	1.13603	912	0.914039	4.75682
608	1	100	-1.14844e+06	16.1224	1.13524	903	0.916805	4.77922
609	1	100	-1.14858e+06	16.2424	1.12686	892	0.917235	4.69671
610	1	100	-1.14916e+06	16.1497	1.12841	898	0.917202	4.68332
611	1	100	-1.14884e+06	16.2378	1.1329	902	0.916728	4.61264
612	1	100	-1.14886e+06	16.2864	1.13673	903	0.916064	4.62636
613	1	100	-1.14807e+06	16.1466	1.12721	924	0.916989	4.57395
614	1	100	-1.14811e+06	16.1462	1.12445	921	0.917296	4.55432
615	1	100	-1.14827e+06	16.14	1.11822	927	0.916601	4.52653
616	1	100	-1.14821e+06	16.2785	1.11529	923	0.918596	4.61472
617	1	100	-1.14767e+06	16.2485	1.11306	921	0.917659	4.52934
618	1	100	-1.14806e+06	16.1929	1.11056	923	0.917881	4.63728
619	1	100	-1.14855e+06	16.1801	1.10713	916	0.919591	4.56916
620	1	100	-1.14794e+06	16.2058	1.11393	899	0.918572	4.62586
621	1	100	-1.14835e+06	16.1958	1.11546	933	0.917273	4.5475
622	1	100	-1.14836e+06	16.1286	1.10728	930	0.918535	4.53665
623	1	100	-1.14814e+06	16.3247	1.10246	920	0.918769	4.61256
624	1	100	-1.14774e+06	16.4768	1.10982	909	0.91902	4.61949
625	1	100	-1.14803e+06	16.3167	1.11228	914	0.915465	4.55838
626	1	100	-1.14817e+06	16.3674	1.1145	931	0.916005	4.65767
627	1	100	-1.14819e+06	16.3963	1.11821	923	0.915166	4.52993
628	1	100	-1.14802e+06	16.3543	1.12224	934	0.914354	4.6551
629	1	100	-1.14777e+06	16.2739	1.132	937	0.914513	4.63157
630	1	100	-1.14784e+06	16.1934	1.14446	931	0.918342	4.59431
631	1	100	-1.1476e+06	16.358	1.14476	921	0.918309	4.62955
632	1	100	-1.14679e+06	16.2306	1.1357	899	0.913045	4.55949
633	1	100	-1.14792e+06	16.2352	1.13476	896	0.91653	4.59927
634	1	100	-1.14764e+06	16.2352	1.1361	899	0.915555	4.59646
635	1	100	-1.14816e+06	16.2369	1.13282	909	0.91595	4.59129
636	1	100	-1.14757e+06	16.1913	1.13445	908	0.912031	4.62235
637	1	100	-1.14735e+06	16.2917	1.12675	887	0.908606	4.65473
638	1	100	-1.14823e+06	16.5262	1.12577	909	0.915728	4.55469
639	1	100	-1.14725e+06	16.2142	1.13529	914	0.911025	4.53946
640	1	100	-1.14818e+06	16.227	1.13417	913	0.911406	4.56037
641	1	100	-1.1479e+06	16.3104	1.14115	913	0.914425	4.68229
642	1	100	-1.14788e+06	16.2398	1.14184	928	0.912311	4.64107
643	1	100	-1.14764e+06	16.2735	1.15562	898	0.909497	4.59513
644	1	100	-1.14723e+06	16.2684	1.1492	932	0.908373	4.58797
645	1	100	-1.14792e+06	16.3422	1.15355	913	0.913755	4.52976
646	1	100	-1.14789e+06	16.2363	1.15889	910	0.913767	4.62298
647	1	100	-1.14807e+06	16.1837	1.15711	913	0.916099	4.62668
648	1	100	-1.14744e+06	16.1288	1.15334	908	0.911214	4.56866
649	1	100	-1.14771e+06	16.153	1.15579	911	0.913346	4.66716
650	1	100	-1.14748e+06	16.0685	1.15756	907	0.913541	4.6176
651	1	100	-1.148e+06	16.0248	1.16171	907	0.914626	4.67855
652	1	100	-1.14829e+06	16.0229	1.15866	918	0.913531	4.65317
653	1	100	-1.14856e+06	16.058	1.15192	919	0.912638	4.58177
654	1	100	-1.14811e+06	16.0247	1.16055	926	0.912986	4.58461
655	1	100	-1.14842e+06	16.0729	1.15904	918	0.915611	4.65763
656	1	100	-1.14846e+06	16.0406	1.15903	937	0.912534	4.5716
657	1	100	-1.1479e+06	15.9519	1.1627	934	0.915208	4.6255
658	1	100	-1.14755e+06	15.9315	1.16399	932	0.912059	4.54891
659	1	100	-1.14783e+06	15.9839	1.16438	944	0.915976	4.61089
660	1	100	-1.14844e+06	15.9232	1.16654	949	0.915026	4.57994
661	1	100	-1.14803e+06	16.0605	1.16365	945	0.915877	4.54509
662	1	100	-1.14766e+06	16.0492	1.16375	928	0.910706	4.66202
663	1	100	-1.14792e+06	16.1403	1.16992	935	0.914813	4.55649
664	1	100	-1.14756e+06	16.1356	1.17444	926	0.912658	4.57485
665	1	100	-1.14772e+06	16.091	1.17216	920	0.910796	4.61474
666	1	100	-1.14739e+06	16.1411	1.18899	917	0.909381	4.59772
667	1	100	-1.14758e+06	16.1689	1.17253	920	0.910081	4.62653
668	1	100	-1.14766e+06	16.1435	1.18072	926	0.909038	4.66734
669	1	100	-1.1474e+06	16.1979	1.17716	960	0.909332	4.55438
670	1	100	-1.14764e+06	16.1326	1.18442	934	0.907064	4.6319
671	1	100	-1.14723e+06	16.1395	1.18487	939	0.905786	4.63718
672	1	100	-1.14725e+06	16.2603	1.19122	936	0.906696	4.71556
673	1	100	-1.14704e+06	16.337	1.173	942	0.908067	4.6443
674	1	100	-1.14722e+06	16.193	1.16804	946	0.908119	4.65774
675	1	100	-1.14723e+06	16.3117	1.15382	930	0.911118	4.67338
676	1	100	-1.1477e+06	16.2587	1.14647	948	0.914195	4.76791
677	1	100	-1.14796e+06	16.2018	1.13359	933	0.914154	4.75121
678	1	100	-1.14784e+06	16.1888	1.13418	942	0.920796	4.752
679	1	100	-1.14827e+06	16.2412	1.14536	923	0.918411	4.72302
680	1	100	-1.14808e+06	16.3148	1.14158	927	0.918925	4.75371
681	1	100	-1.14785e+06	16.2455	1.13051	920	0.918438	4.65955
682	1	100	-1.14865e+06	16.3887	1.13274	923	0.926445	4.66071
683	1	100	-1.14831e+06	16.1174	1.12429	927	0.918383	4.64665
684	1	100	-1.14829e+06	16.1228	1.13725	943	0.919529	4.71581
685	1	100	-1.1484e+06	16.1253	1.13418	937	0.917495	4.68687
686	1	100	-1.14882e+06	16.0511	1.13317	918	0.916218	4.60972
687	1	100	-1.1483e+06	15.9781	1.13762	922	0.916163	4.6178
688	1	100	-1.14808e+06	16.167	1.13491	933	0.916297	4.51784
689	1	100	-1.14768e+06	16.1892	1.13426	924	0.915282	4.6977
690	1	100	-1.14765e+06	16.1578	1.14028	925	0.914493	4.68459
691	1	100	-1.1482e+06	16.1371	1.13123	947	0.915266	4.67131
692	1	100	-1.1475e+06	16.2558	1.13173	948	0.919017	4.68906
693	1	100	-1.14797e+06	16.0755	1.12959	943	0.917613	4.62001
694	1	100	-1.14838e+06	16.1104	1.12546	931	0.918395	4.61639
695	1	100	-1.1488e+06	16.1947	1.11978	915	0.918399	4.61418
696	1	100	-1.14854e+06	16.1354	1.12769	923	0.918591	4.71208
697	1	100	-1.14878e+06	16.0655	1.1125	928	0.917721	4.66357
698	1	100	-1.1489e+06	16.1745	1.10818	912	0.918559	4.66614
699	1	100	-1.1492e+06	16.1671	1.09995	915	0.919378	4.82122
700	1	100	-1.14863e+06	16.1732	1.09733	922	0.920589	4.62938
701	1	100	-1.14818e+06	16.2693	1.10148	950	0.920168	4.58744
702	1	100	-1.14852e+06	16.1647	1.107	944	0.920579	4.69613
703	1	100	-1.1484e+06	16.2607	1.11395	924	0.919042	4.65558
704	1	100	-1.1489e+06	16.313	1.11167	927	0.927956	4.63187
705	1	100	-1.14768e+06	16.1926	1.11292	941	0.922798	4.50516
706	1	100	-1.14856e+06	16.0852	1.11093	935	0.916601	4.54047
707	1	100	-1.14831e+06	16.2596	1.11783	936	0.921507	4.54287
708	1	100	-1.14814e+06	16.2202	1.11181	951	0.91681	4.63972
709	1	100	-1.14835e+06	16.2837	1.09975	936	0.920596	4.65661
710	1	100	-1.14874e+06	16.2387	1.10223	924	0.922893	4.6416
711	1	100	-1.1486e+06	16.145	1.11068	927	0.918876	4.56909
712	1	100	-1.14848e+06	16.1706	1.11479	907	0.920217	4.5821
713	1	100	-1.14844e+06	16.1987	1.1256	884	0.921785	4.63539
714	1	100	-1.1484e+06	16.1435	1.12508	906	0.920345	4.5355
715	1	100	-1.14867e+06	16.136	1.11829	911	0.923273	4.58383
716	1	100	-1.14819e+06	16.1514	1.11021	908	0.921249	4.56818
717	1	100	-1.14839e+06	16.3146	1.10991	913	0.920586	4.5148
718	1	100	-1.14835e+06	16.3354	1.10951	901	0.919536	4.61892
719	1	100	-1.14807e+06	16.0959	1.11457	910	0.915443	4.57447
720	1	100	-1.14857e+06	16.1685	1.11525	905	0.92132	4.48616
721	1	100	-1.1483e+06	16.2734	1.10037	929	0.924265	4.57351
722	1	100	-1.14842e+06	16.1405	1.10966	905	0.921097	4.48531
723	1	100	-1.14839e+06	16.1958	1.11268	893	0.918584	4.59945
724	1	100	-1.14852e+06	16.2952	1.11998	898	0.919881	4.65251
725	1	100	-1.14881e+06	16.201	1.12752	897	0.918914	4.68038
726	1	100	-1.14848e+06	16.0549	1.13827	908	0.91606	4.67723
727	1	100	-1.14818e+06	16.0816	1.13243	915	0.911307	4.66548
728	1	100	-1.14871e+06	16.4141	1.13273	898	0.916279	4.64858
729	1	100	-1.14815e+06	16.3742	1.13368	914	0.913203	4.70434
730	1	100	-1.1483e+06	16.3494	1.12483	917	0.91902	4.60251
731	1	100	-1.14801e+06	16.2801	1.13149	907	0.917956	4.46134
732	1	100	-1.14801e+06	16.2402	1.1329	912	0.915779	4.71738
733	1	100	-1.14821e+06	16.3295	1.13401	916	0.917322	4.60925
734	1	100	-1.14833e+06	16.2995	1.12649	894	0.919124	4.72008
735	1	100	-1.14771e+06	16.2289	1.12537	925	0.9158	4.65653
736	1	100	-1.14792e+06	16.285	1.13396	940	0.915009	4.72749
737	1	100	-1.14789e+06	16.264	1.14111	913	0.915396	4.66984
738	1	100	-1.14786e+06	16.1914	1.13848	910	0.917372	4.61202
739	1	100	-1.14816e+06	16.1355	1.13512	900	0.914324	4.63401
740	1	100	-1.14796e+06	16.2053	1.14192	915	0.916148	4.78394
741	1	100	-1.14817e+06	16.2303	1.13759	903	0.91458	4.70068
742	1	100	-1.14774e+06	16.2608	1.14042	906	0.916317	4.67661
743	1	100	-1.14765e+06	16.2578	1.14323	934	0.916789	4.56487
744	1	100	-1.1484e+06	16.3313	1.12866	926	0.917987	4.68466
745	1	100	-1.14797e+06	16.2064	1.13532	934	0.913442	4.69125
746	1	100	-1.14794e+06	16.1013	1.13875	930	0.909741	4.65633
747	1	100	-1.1482e+06	16.2312	1.15149	929	0.916059	4.65726
748	1	100	-1.14767e+06	16.2447	1.15181	930	0.911508	4.59646
749	1	100	-1.1472e+06	16.2773	1.16263	919	0.912676	4.75582
750	1	100	-1.14772e+06	16.1352	1.15296	907	0.913669	4.58349
751	1	100	-1.1474e+06	16.2304	1.13859	906	0.914624	4.58403
752	1	100	-1.14763e+06	16.2603	1.13534	910	0.915629	4.59689
753	1	100	-1.14692e+06	16.3055	1.13718	924	0.909122	4.60454
754	1	100	-1.14733e+06	16.3936	1.13805	930	0.910652	4.61046
755	1	100	-1.1476e+06	16.2777	1.14258	928	0.912484	4.63215
756	1	100	-1.1473e+06	16.1432	1.14513	918	0.911538	4.50265
757	1	100	-1.1475e+06	16.2828	1.14019	925	0.909574	4.5975
758	1	100	-1.1471e+06	16.3473	1.14758	911	0.911734	4.58782
759	1	100	-1.14712e+06	16.4483	1.15563	928	0.909689	4.63293
760	1	100	-1.14721e+06	16.4007	1.14052	895	0.910967	4.70008
761	1	100	-1.14725e+06	16.2171	1.14449	905	0.912592	4.62565
762	1	100	-1.14732e+06	16.1416	1.14513	915	0.911752	4.67789
763	1	100	-1.14741e+06	16.4134	1.13751	901	0.911818	4.67017
764	1	100	-1.14804e+06	16.3695	1.13478	919	0.91336	4.63796
765	1	100	-1.14747e+06	16.2839	1.14451	913	0.912383	4.52413
766	1	100	-1.14744e+06	16.2266	1.1456	905	0.911643	4.6189
767	1	100	-1.14793e+06	16.2252	1.14283	896	0.91195	4.642
768	1	100	-1.14759e+06	16.2651	1.13971	911	0.910873	4.62745
769	1	100	-1.14719e+06	16.2262	1.13049	910	0.914	4.70648
770	1	100	-1.14801e+06	16.3345	1.1197	904	0.916115	4.68347
771	1	100	-1.14815e+06	16.2437	1.12306	915	0.915594	4.63972
772	1	100	-1.14806e+06	16.2575	1.12133	888	0.914869	4.59991
773	1	100	-1.14766e+06	16.2873	1.11701	923	0.913778	4.60652
774	1	100	-1.14725e+06	16.3322	1.14537	905	0.912802	4.55162
775	1	100	-1.14758e+06	16.204	1.14159	925	0.912066	4.70087
776	1	100	-1.14723e+06	16.1841	1.14297	919	0.911281	4.71991
777	1	100	-1.14694e+06	16.2631	1.15014	921	0.912539	4.6069
778	1	100	-1.14704e+06	16.129	1.14995	915	0.909856	4.67475
779	1	100	-1.14781e+06	16.1946	1.14264	935	0.911276	4.57888
780	1	100	-1.14764e+06	16.1994	1.11987	930	0.912861	4.58502
781	1	100	-1.14748e+06	16.1911	1.13468	922	0.912542	4.46527
782	1	100	-1.14736e+06	16.0685	1.13703	916	0.913433	4.58478
783	1	100	-1.14817e+06	16.129	1.13086	920	0.915009	4.64401
784	1	100	-1.14759e+06	16.0163	1.1344	920	0.914833	4.60044
785	1	100	-1.14754e+06	16.1283	1.12349	904	0.913509	4.65651
786	1	100	-1.1478e+06	16.2637	1.1375	925	0.912571	4.56141
787	1	100	-1.14796e+06	16.272	1.13767	932	0.914316	4.69048
788	1	100	-1.14747e+06	16.1755	1.14788	911	0.908453	4.61805
789	1	100	-1.14814e+06	16.3586	1.13799	924	0.914448	4.71998
790	1	100	-1.14785e+06	16.3176	1.14303	924	0.911283	4.69599
791	1	100	-1.14771e+06	16.1492	1.14888	938	0.911547	4.74342
792	1	100	-1.14764e+06	16.2519	1.14637	916	0.913307	4.65579
793	1	100	-1.1477e+06	16.2615	1.15134	932	0.913779	4.7167
794	1	100	-1.1475e+06	16.1292	1.14798	921	0.913802	4.66269
795	1	100	-1.1482e+06	16.0989	1.1516	915	0.916893	4.50987
796	1	100	-1.14786e+06	16.1371	1.14743	925	0.918587	4.53964
797	1	100	-1.14816e+06	16.0788	1.1357	907	0.914533	4.7128
798	1	100	-1.14817e+06	16.1991	1.13163	916	0.916221	4.81726
799	1	100	-1.14827e+06	16.1001	1.13906	907	0.916531	4.69275
800	1	100	-1.14855e+06	16.2298	1.13813	912	0.920421	4.61868
801	1	100	-1.14835e+06	16.1869	1.13584	912	0.917218	4.60386
802	1	100	-1.14834e+06	16.0521	1.13211	903	0.915855	4.60533
803	1	100	-1.14825e+06	16.1835	1.1336	907	0.915905	4.62629
804	1	100	-1.14777e+06	16.1988	1.13852	912	0.915302	4.59629
805	1	100	-1.14871e+06	16.2151	1.13697	924	0.919709	4.55127
806	1	100	-1.14787e+06	16.1915	1.14843	929	0.916052	4.56696
807	1	100	-1.14811e+06	16.0823	1.15492	925	0.915306	4.45033
808	1	100	-1.14821e+06	15.968	1.1461	931	0.914019	4.56943
809	1	100	-1.14817e+06	16.0645	1.13199	924	0.915866	4.61693
810	1	100	-1.14802e+06	16.1664	1.126	932	0.916316	4.50531
811	1	100	-1.14871e+06	16.1376	1.11778	934	0.919488	4.57859
812	1	100	-1.14831e+06	16.0794	1.12273	929	0.916684	4.56622
813	1	100	-1.14847e+06	16.1154	1.13515	929	0.915342	4.6435
814	1	100	-1.14857e+06	16.1202	1.13371	920	0.918409	4.66071
815	1	100	-1.14857e+06	15.9586	1.12767	926	0.919888	4.57571
816	1	100	-1.1484e+06	15.9839	1.13705	900	0.918358	4.55496
817	1	100	-1.14809e+06	15.9848	1.1448	912	0.915959	4.50295
818	1	100	-1.14809e+06	15.9997	1.1527	934	0.916602	4.52498
819	1	100	-1.14773e+06	16.0301	1.14321	946	0.916263	4.57024
820	1	100	-1.14688e+06	15.902	1.15191	951	0.914349	4.63974
821	1	100	-1.14736e+06	16.0055	1.1507	933	0.912991	4.4793
822	1	100	-1.14793e+06	16.1607	1.13897	928	0.914583	4.45555
823	1	100	-1.14732e+06	16.181	1.13704	938	0.914776	4.59258
824	1	100	-1.14763e+06	16.0138	1.14131	927	0.913483	4.45908
825	1	100	-1.1472e+06	16.2049	1.13603	916	0.915173	4.51684
826	1	100	-1.14773e+06	16.2587	1.12427	925	0.918665	4.63321
827	1	100	-1.14851e+06	16.3162	1.11326	937	0.9206	4.49347
828	1	100	-1.148e+06	16.2281	1.12481	903	0.916354	4.61143
829	1	100	-1.14739e+06	16.3128	1.12565	926	0.912495	4.54982
830	1	100	-1.14807e+06	16.3907	1.12453	935	0.916424	4.50497
831	1	100	-1.14792e+06	16.3591	1.12194	927	0.918101	4.47234
832	1	100	-1.14786e+06	16.3755	1.1262	952	0.91502	4.64669
833	1	100	-1.14823e+06	16.2255	1.13227	946	0.915411	4.59897
834	1	100	-1.14859e+06	16.2736	1.13239	946	0.918431	4.4599
835	1	100	-1.14829e+06	16.2145	1.1287	931	0.914875	4.53034
836	1	100	-1.14792e+06	16.2611	1.12523	931	0.917246	4.6228
837	1	100	-1.14856e+06	16.1589	1.12873	935	0.915263	4.5612
838	1	100	-1.14792e+06	16.0756	1.13111	937	0.912446	4.58813
839	1	100	-1.14848e+06	16.2232	1.12242	928	0.916605	4.52245
840	1	100	-1.14831e+06	16.2538	1.13112	931	0.918653	4.60829
841	1	100	-1.1478e+06	16.198	1.12842	921	0.919421	4.54574
842	1	100	-1.14796e+06	16.0581	1.13266	931	0.918959	4.47059
843	1	100	-1.14798e+06	16.0412	1.13506	936	0.919893	4.47924
844	1	100	-1.14791e+06	15.972	1.14812	918	0.91769	4.57511
845	1	100	-1.14791e+06	15.9619	1.15756	945	0.913086	4.52446
846	1	100	-1.14751e+06	16.0219	1.15856	944	0.908802	4.56882
847	1	100	-1.14763e+06	16.2263	1.14137	935	0.913334	4.56041
848	1	100	-1.14784e+06	16.3107	1.14855	923	0.914066	4.47529
849	1	100	-1.1477e+06	16.3649	1.14803	917	0.911596	4.50818
850	1	100	-1.14767e+06	16.3233	1.143	934	0.911126	4.53279
851	1	100	-1.14818e+06	16.3441	1.1451	925	0.913241	4.60026
852	1	100	-1.14749e+06	16.2163	1.15389	944	0.909285	4.48571
853	1	100	-1.14743e+06	16.2666	1.15559	928	0.913066	4.51959
854	1	100	-1.14797e+06	16.3217	1.16183	942	0.911416	4.58351
855	1	100	-1.1479e+06	16.3787	1.15599	908	0.910279	4.64616
856	1	100	-1.14736e+06	16.3731	1.15001	936	0.909728	4.59381
857	1	100	-1.1479e+06	16.271	1.16476	900	0.909828	4.57047
858	1	100	-1.14754e+06	16.2289	1.1897	918	0.90782	4.50676
859	1	100	-1.14732e+06	16.1598	1.18628	911	0.908266	4.43635
860	1	100	-1.14715e+06	16.0911	1.18312	924	0.907652	4.52018
861	1	100	-1.14743e+06	16.1477	1.19111	922	0.910123	4.50292
862	1	100	-1.14761e+06	16.2705	1.17483	887	0.909674	4.56228
863	1	100	-1.14737e+06	16.1781	1.17188	870	0.91161	4.50494
864	1	100	-1.14723e+06	16.1817	1.16369	886	0.909413	4.51781
865	1	100	-1.14711e+06	16.1115	1.17393	878	0.905411	4.42231
866	1	100	-1.14788e+06	16.2058	1.16473	885	0.908562	4.43616
867	1	100	-1.14768e+06	16.2618	1.1601	885	0.913677	4.51849
868	1	100	-1.14808e+06	16.0584	1.148	880	0.910109	4.58365
869	1	100	-1.14792e+06	16.1019	1.14885	877	0.907213	4.61808
870	1	100	-1.14801e+06	16.3326	1.1438	897	0.912737	4.61568
871	1	100	-1.14833e+06	16.2704	1.14624	880	0.914043	4.55163
872	1	100	-1.14811e+06	16.2407	1.14502	904	0.915219	4.65407
873	1	100	-1.14844e+06	16.2482	1.14225	919	0.915104	4.56751
874	1	100	-1.14756e+06	16.178	1.13707	903	0.913428	4.54572
875	1	100	-1.14782e+06	16.221	1.13426	907	0.912785	4.59112
876	1	100	-1.1477e+06	16.1647	1.13906	892	0.914505	4.48029
877	1	100	-1.14853e+06	16.0652	1.13255	895	0.915394	4.47834
878	1	100	-1.14774e+06	16.0839	1.13948	890	0.914844	4.56009
879	1	100	-1.14701e+06	16.1809	1.14907	893	0.912902	4.55325
880	1	100	-1.14779e+06	16.1447	1.1492	888	0.916589	4.48949
881	1	100	-1.14774e+06	16.0758	1.15289	896	0.918099	4.52176
882	1	100	-1.14818e+06	16.0898	1.14337	897	0.917066	4.60792
883	1	100	-1.1473e+06	16.0856	1.15169	896	0.912555	4.51637
884	1	100	-1.14767e+06	16.1622	1.1534	920	0.914888	4.50292
885	1	100	-1.1479e+06	16.1875	1.14892	897	0.915247	4.42342
886	1	100	-1.14724e+06	16.1526	1.14759	895	0.914737	4.53802
887	1	100	-1.14788e+06	16.1095	1.13854	921	0.912514	4.61511
888	1	100	-1.14774e+06	16.0654	1.14901	922	0.913575	4.66788
889	1	100	-1.14761e+06	16.1454	1.15046	906	0.911442	4.5595
890	1	100	-1.1479e+06	16.1472	1.13737	914	0.913777	4.56216
891	1	100	-1.14767e+06	16.0605	1.14026	908	0.911509	4.655
892	1	100	-1.14757e+06	16.1641	1.16242	908	0.912509	4.60476
893	1	100	-1.14742e+06	16.0664	1.15991	922	0.913173	4.61196
894	1	100	-1.14709e+06	16.0718	1.16375	902	0.911188	4.57262
895	1	100	-1.14709e+06	16.042	1.16243	928	0.910348	4.5368
896	1	100	-1.1471e+06	15.9728	1.16491	929	0.909759	4.52495
897	1	100	-1.14716e+06	16.041	1.16852	914	0.909006	4.58831
898	1	100	-1.14771e+06	16.1072	1.15882	948	0.91071	4.5688
899	1	100	-1.14779e+06	16.2745	1.15704	937	0.916374	4.58592
900	1	100	-1.14714e+06	16.1958	1.15831	949	0.913945	4.65338
901	1	100	-1.1475e+06	16.1665	1.16804	948	0.913353	4.5525
902	1	100	-1.14712e+06	16.1278	1.16588	957	0.912507	4.57294
903	1	100	-1.14753e+06	16.0999	1.1651	953	0.910468	4.63479
904	1	100	-1.14723e+06	16.1165	1.15242	945	0.910855	4.61756
905	1	100	-1.14718e+06	16.1488	1.15284	938	0.910188	4.68112
906	1	100	-1.14754e+06	16.2042	1.14662	935	0.911971	4.6528
907	1	100	-1.14785e+06	16.238	1.1432	926	0.911348	4.59219
908	1	100	-1.14757e+06	16.2399	1.13829	921	0.911835	4.56148
909	1	100	-1.14775e+06	16.2341	1.14084	925	0.911894	4.66502
910	1	100	-1.14776e+06	16.1729	1.14658	923	0.913782	4.57972
911	1	100	-1.14757e+06	16.3237	1.14998	948	0.91349	4.46396
912	1	100	-1.14749e+06	16.3697	1.1494	939	0.911077	4.48931
913	1	100	-1.14843e+06	16.2889	1.1353	915	0.91066	4.57161
914	1	100	-1.14794e+06	16.3407	1.13754	925	0.913203	4.56041
915	1	100	-1.14817e+06	16.304	1.12318	932	0.915055	4.47165
916	1	100	-1.14757e+06	16.3234	1.12949	939	0.913487	4.52264
917	1	100	-1.1484e+06	16.4637	1.12451	927	0.915399	4.60632
918	1	100	-1.148e+06	16.351	1.12736	929	0.916483	4.54895
919	1	100	-1.14866e+06	16.3363	1.12794	935	0.916778	4.61298
920	1	100	-1.14873e+06	16.252	1.12811	926	0.916694	4.62622
921	1	100	-1.14773e+06	16.3544	1.13443	924	0.912917	4.59624
922	1	100	-1.14739e+06	16.4732	1.12277	949	0.912079	4.78648
923	1	100	-1.14763e+06	16.4414	1.12403	948	0.913912	4.76495
924	1	100	-1.14755e+06	16.4106	1.12741	942	0.914111	4.64215
925	1	100	-1.14707e+06	16.4448	1.13527	949	0.914851	4.72299
926	1	100	-1.14681e+06	16.3412	1.13952	942	0.914384	4.62822
927	1	100	-1.1477e+06	16.2423	1.12802	954	0.914938	4.62792
928	1	100	-1.14766e+06	16.3676	1.12501	946	0.916279	4.63809
929	1	100	-1.14766e+06	16.3184	1.13012	950	0.915167	4.59958
930	1	100	-1.14814e+06	16.3478	1.12306	950	0.912737	4.69503
931	1	100	-1.14723e+06	16.3804	1.11789	944	0.914427	4.57831
932	1	100	-1.14771e+06	16.5152	1.11783	920	0.913721	4.64014
933	1	100	-1.14796e+06	16.3328	1.1164	929	0.913989	4.57091
934	1	100	-1.14846e+06	16.3755	1.10384	920	0.915695	4.71193
935	1	100	-1.14787e+06	16.3532	1.11182	935	0.914026	4.639
936	1	100	-1.14822e+06	16.5197	1.09862	933	0.917383	4.61744
937	1	100	-1.14773e+06	16.5542	1.09241	938	0.918096	4.63357
938	1	100	-1.14758e+06	16.5464	1.09808	930	0.916716	4.49463
939	1	100	-1.14745e+06	16.48	1.0911	932	0.919745	4.5467
940	1	100	-1.14814e+06	16.4115	1.09251	932	0.918902	4.67576
941	1	100	-1.14769e+06	16.3959	1.0979	936	0.917301	4.62479
942	1	100	-1.14757e+06	16.2204	1.09385	959	0.918594	4.56319
943	1	100	-1.14822e+06	16.1786	1.0909	953	0.921317	4.63399
944	1	100	-1.14822e+06	15.9907	1.09895	947	0.920504	4.63246
945	1	100	-1.14824e+06	16.1305	1.09711	938	0.919779	4.55416
946	1	100	-1.14822e+06	16.119	1.09874	944	0.918925	4.5671
947	1	100	-1.14791e+06	16.2437	1.09588	958	0.920186	4.56123
948	1	100	-1.14782e+06	16.3559	1.09414	965	0.920206	4.56458
949	1	100	-1.14745e+06	16.2863	1.09194	984	0.919678	4.5394
950	1	100	-1.14793e+06	16.3776	1.08537	971	0.921878	4.56728
951	1	100	-1.14818e+06	16.3316	1.09253	959	0.919277	4.55506
952	1	100	-1.14794e+06	16.311	1.09494	957	0.916464	4.49152
953	1	100	-1.14866e+06	16.2941	1.11004	943	0.921911	4.51507
954	1	100	-1.14764e+06	16.3362	1.11493	953	0.917899	4.48829
955	1	100	-1.14812e+06	16.2994	1.11937	927	0.920552	4.64802
956	1	100	-1.14824e+06	16.1359	1.12317	928	0.919611	4.47201
957	1	100	-1.14797e+06	16.1619	1.1271	925	0.919089	4.62034
958	1	100	-1.14767e+06	16.1627	1.12424	948	0.918309	4.61933
959	1	100	-1.14728e+06	16.2639	1.11173	948	0.915547	4.51084
960	1	100	-1.14772e+06	16.3234	1.1138	967	0.91286	4.62222
961	1	100	-1.14809e+06	16.2748	1.10147	964	0.917433	4.5814
962	1	100	-1.14766e+06	16.2508	1.10767	963	0.91789	4.7089
963	1	100	-1.14811e+06	16.2863	1.10101	958	0.921725	4.64876
964	1	100	-1.14796e+06	16.3367	1.09052	942	0.919059	4.60189
965	1	100	-1.14786e+06	16.4316	1.09445	947	0.921679	4.61968
966	1	100	-1.14839e+06	16.4634	1.09252	944	0.919355	4.74778
967	1	100	-1.14825e+06	16.3208	1.10661	938	0.917741	4.61899
968	1	100	-1.14826e+06	16.261	1.10212	948	0.919452	4.66792
969	1	100	-1.14835e+06	16.3433	1.09807	952	0.921692	4.71154
970	1	100	-1.14796e+06	16.1007	1.10902	938	0.917539	4.59388
971	1	100	-1.14856e+06	16.2571	1.10116	942	0.920682	4.69192
972	1	100	-1.14811e+06	16.1989	1.09691	935	0.92246	4.52475
973	1	100	-1.14874e+06	16.2267	1.10343	957	0.922486	4.46005
974	1	100	-1.14804e+06	16.2248	1.09952	960	0.917622	4.43629
975	1	100	-1.14822e+06	16.1922	1.08694	931	0.918484	4.54986
976	1	100	-1.14902e+06	16.3454	1.07867	944	0.922535	4.55912
977	1	100	-1.14873e+06	16.2772	1.08101	936	0.920755	4.57342
978	1	100	-1.14814e+06	16.2388	1.09393	946	0.922623	4.59741
979	1	100	-1.14856e+06	16.2721	1.0972	941	0.922413	4.57318
980	1	100	-1.14846e+06	16.3765	1.09475	937	0.923856	4.53847
981	1	100	-1.14844e+06	16.4365	1.09423	958	0.925149	4.71746
982	1	100	-1.14896e+06	16.2965	1.09482	921	0.925306	4.71928
983	1	100	-1.1482e+06	16.1719	1.09869	943	0.919568	4.71583
984	1	100	-1.1484e+06	16.4176	1.0866	938	0.924314	4.61198
985	1	100	-1.14889e+06	16.3654	1.0938	945	0.922315	4.67669
986	1	100	-1.14873e+06	16.2708	1.09235	945	0.923677	4.61623
987	1	100	-1.14863e+06	16.0893	1.08395	932	0.925342	4.60191
988	1	100	-1.14908e+06	16.194	1.08893	931	0.925885	4.60181
989	1	100	-1.14909e+06	16.345	1.09367	924	0.924299	4.64931
990	1	100	-1.14844e+06	16.2574	1.08979	933	0.921841	4.63695
991	1	100	-1.14827e+06	16.1108	1.09421	938	0.920054	4.57607
992	1	100	-1.14821e+06	16.4062	1.09156	935	0.919028	4.59248
993	1	100	-1.14829e+06	16.2931	1.08706	939	0.919869	4.64143
994	1	100	-1.14845e+06	16.2579	1.07461	953	0.921034	4.73496
995	1	100	-1.14848e+06	16.3887	1.07304	950	0.92397	4.7538
996	1	100	-1.14823e+06	16.3799	1.09159	953	0.919043	4.8177
997	1	100	-1.14858e+06	16.2861	1.09462	947	0.91908	4.7121
998	1	100	-1.14796e+06	16.2594	1.09778	948	0.919514	4.62549
999	1	100	-1.14855e+06	16.2142	1.10837	964	0.919309	4.6972
1000	1	100	-1.14861e+06	16.3485	1.10426	971	0.91766	4.80363
1001	1	100	-1.14814e+06	16.1832	1.10447	957	0.915611	4.59977
1002	1	100	-1.14806e+06	16.1593	1.11797	951	0.920145	4.61755
1003	1	100	-1.14793e+06	16.0762	1.11338	960	0.918825	4.56793
1004	1	100	-1.14863e+06	16.1352	1.11046	951	0.918688	4.52005
1005	1	100	-1.14845e+06	16.2031	1.11399	941	0.918382	4.44275
1006	1	100	-1.1481e+06	16.1496	1.11002	936	0.913482	4.55451
1007	1	100	-1.1484e+06	16.1873	1.10523	929	0.918281	4.51869
1008	1	100	-1.14889e+06	16.0929	1.11204	938	0.922003	4.70555
1009	1	100	-1.14785e+06	16.0724	1.10865	941	0.916704	4.60153
1010	1	100	-1.14819e+06	16.1689	1.09663	946	0.91648	4.59516
1011	1	100	-1.14861e+06	16.2731	1.09681	944	0.920839	4.64635
1012	1	100	-1.14867e+06	16.3322	1.09384	917	0.925984	4.63958
1013	1	100	-1.14907e+06	16.0849	1.0965	921	0.923263	4.58847
1014	1	100	-1.14904e+06	15.9939	1.10131	919	0.924945	4.67244
1015	1	100	-1.14932e+06	16.1448	1.09914	906	0.924776	4.68078
1016	1	100	-1.14867e+06	16.055	1.10057	920	0.9224	4.72217
1017	1	100	-1.14928e+06	16.1728	1.10631	909	0.925123	4.61378
1018	1	100	-1.14872e+06	16.0767	1.10948	907	0.92182	4.48267
1019	1	100	-1.14888e+06	16.0453	1.11728	902	0.921681	4.7031
1020	1	100	-1.14865e+06	16.0752	1.11727	913	0.921232	4.54023
1021	1	100	-1.14848e+06	16.0096	1.11756	912	0.918491	4.60511
1022	1	100	-1.1487e+06	15.8984	1.1268	901	0.920196	4.6456
1023	1	100	-1.14824e+06	15.8175	1.13694	914	0.915654	4.55362
1024	1	100	-1.14854e+06	15.9142	1.12693	928	0.919451	4.60678
1025	1	100	-1.14883e+06	15.8677	1.13406	904	0.9183	4.53976
1026	1	100	-1.1491e+06	15.8975	1.1262	922	0.921302	4.54059
1027	1	100	-1.14857e+06	15.9981	1.12223	920	0.922504	4.57041
1028	1	100	-1.14839e+06	15.939	1.11631	912	0.921072	4.59003
1029	1	100	-1.14851e+06	15.8833	1.11547	929	0.916839	4.50089
1030	1	100	-1.14853e+06	16.0573	1.11775	924	0.918708	4.554
1031	1	100	-1.14864e+06	16.041	1.11801	945	0.918883	4.60261
1032	1	100	-1.14831e+06	16.194	1.12872	928	0.921001	4.66366
1033	1	100	-1.14875e+06	16.1521	1.12994	919	0.918731	4.57671
1034	1	100	-1.14878e+06	16.1928	1.12116	909	0.91793	4.54671
1035	1	100	-1.14857e+06	16.0865	1.12055	925	0.916995	4.62821
1036	1	100	-1.14878e+06	16.1088	1.12647	911	0.918364	4.55945
1037	1	100	-1.14878e+06	16.2088	1.13207	903	0.916984	4.53274
1038	1	100	-1.14852e+06	16.0425	1.13527	909	0.914226	4.5568
1039	1	100	-1.14844e+06	16.0233	1.1368	918	0.912091	4.58466
1040	1	100	-1.14752e+06	16.1161	1.14275	917	0.913798	4.55534
1041	1	100	-1.14779e+06	16.1222	1.13676	913	0.910227	4.46012
1042	1	100	-1.14751e+06	16.1456	1.12899	915	0.911136	4.51355
1043	1	100	-1.14762e+06	16.2513	1.12801	903	0.914361	4.51608
1044	1	100	-1.14798e+06	16.2172	1.13407	912	0.911858	4.56871
1045	1	100	-1.14787e+06	16.2766	1.13933	915	0.912187	4.48478
1046	1	100	-1.14784e+06	16.3296	1.14213	935	0.909742	4.57115
1047	1	100	-1.14739e+06	16.2907	1.15077	924	0.907959	4.57632
1048	1	100	-1.14818e+06	16.3368	1.16495	926	0.911718	4.61172
1049	1	100	-1.14814e+06	16.2592	1.17344	925	0.910205	4.63777
1050	1	100	-1.14767e+06	16.1697	1.18222	918	0.913065	4.58202
1051	1	100	-1.14756e+06	16.1323	1.16868	918	0.910277	4.57839
1052	1	100	-1.14784e+06	16.1194	1.1629	910	0.91463	4.55768
1053	1	100	-1.14838e+06	16.0864	1.15947	911	0.915105	4.66196
1054	1	100	-1.14815e+06	16.2204	1.15853	926	0.913231	4.64541
1055	1	100	-1.14815e+06	16.2641	1.16459	919	0.915663	4.47764
1056	1	100	-1.14782e+06	16.1445	1.15325	929	0.911616	4.46688
1057	1	100	-1.14762e+06	16.168	1.15724	934	0.911082	4.51598
1058	1	100	-1.14805e+06	16.2493	1.15023	943	0.915909	4.53984
1059	1	100	-1.14825e+06	16.1902	1.13808	955	0.915671	4.66475
1060	1	100	-1.14824e+06	16.1092	1.12874	925	0.911617	4.55493
1061	1	100	-1.14859e+06	16.2566	1.13646	912	0.912216	4.61989
1062	1	100	-1.14841e+06	16.4615	1.13011	924	0.916815	4.5697
1063	1	100	-1.14833e+06	16.3302	1.13623	922	0.911404	4.50578
1064	1	100	-1.14838e+06	16.4613	1.13335	927	0.914568	4.61793
1065	1	100	-1.14816e+06	16.3477	1.12981	910	0.914064	4.51735
1066	1	100	-1.14744e+06	16.2272	1.14146	927	0.912879	4.49955
1067	1	100	-1.14811e+06	16.2915	1.13541	924	0.914877	4.51425
1068	1	100	-1.14768e+06	16.2337	1.13504	916	0.913197	4.47742
1069	1	100	-1.14798e+06	16.292	1.13487	932	0.916171	4.51798
1070	1	100	-1.14802e+06	16.1811	1.13764	931	0.913127	4.54364
1071	1	100	-1.14851e+06	16.1679	1.14331	921	0.916039	4.54283
1072	1	100	-1.14872e+06	16.0873	1.15022	925	0.916188	4.55461
1073	1	100	-1.14844e+06	16.2832	1.13626	931	0.913879	4.60088
1074	1	100	-1.1485e+06	16.1823	1.13666	926	0.91271	4.61724
1075	1	100	-1.14877e+06	16.2264	1.12554	915	0.91631	4.65837
1076	1	100	-1.14939e+06	16.2372	1.12798	909	0.918218	4.61016
1077	1	100	-1.14884e+06	16.0621	1.12691	910	0.916349	4.59651
1078	1	100	-1.14906e+06	16.1626	1.12553	914	0.913125	4.65388
1079	1	100	-1.14913e+06	16.1851	1.12229	904	0.918438	4.63054
1080	1	100	-1.14858e+06	16.2039	1.10964	901	0.916142	4.49579
1081	1	100	-1.14887e+06	16.2761	1.11098	914	0.915731	4.56005
1082	1	100	-1.14852e+06	16.2936	1.12169	907	0.913699	4.57919
1083	1	100	-1.14826e+06	16.2915	1.12241	940	0.918773	4.66817
1084	1	100	-1.14887e+06	16.2867	1.11688	935	0.919117	4.68967
1085	1	100	-1.14911e+06	16.3131	1.11232	933	0.919529	4.68712
1086	1	100	-1.14872e+06	16.1842	1.11088	923	0.917902	4.75307
1087	1	100	-1.14872e+06	16.1389	1.11835	913	0.91795	4.64048
1088	1	100	-1.14884e+06	16.1873	1.12389	910	0.917921	4.62132
1089	1	100	-1.14896e+06	16.1716	1.12837	920	0.919146	4.53709
1090	1	100	-1.14888e+06	16.1728	1.12615	913	0.916255	4.60964
1091	1	100	-1.1484e+06	16.2476	1.12069	916	0.916978	4.63825
1092	1	100	-1.14901e+06	16.1589	1.13155	913	0.917959	4.58604
1093	1	100	-1.14886e+06	16.1935	1.12723	911	0.917493	4.61234
1094	1	100	-1.14884e+06	16.083	1.13398	900	0.91852	4.5547
1095	1	100	-1.14855e+06	16.1612	1.13418	912	0.919502	4.53205
1096	1	100	-1.14869e+06	16.1273	1.14288	915	0.919415	4.63174
1097	1	100	-1.14847e+06	16.2712	1.13424	898	0.919959	4.5686
1098	1	100	-1.14882e+06	16.1532	1.14188	908	0.92032	4.58022
1099	1	100	-1.14913e+06	16.1449	1.14288	899	0.923979	4.60199
1100	1	100	-1.14859e+06	15.9904	1.14626	905	0.916224	4.65801
1101	1	100	-1.149e+06	16.2037	1.14527	915	0.919185	4.68164
1102	1	100	-1.14894e+06	16.0892	1.15036	929	0.916651	4.58445
1103	1	100	-1.14835e+06	16.0859	1.14648	909	0.916615	4.60948
1104	1	100	-1.14806e+06	16.1336	1.14534	918	0.917251	4.50703
1105	1	100	-1.14832e+06	16.1163	1.13752	909	0.917387	4.54592
1106	1	100	-1.14822e+06	15.9822	1.13706	907	0.916593	4.48354
1107	1	100	-1.14785e+06	15.9686	1.13287	920	0.914402	4.46555
1108	1	100	-1.14812e+06	16.1256	1.14374	911	0.916485	4.49133
1109	1	100	-1.14838e+06	16.1982	1.13127	908	0.914113	4.44341
1110	1	100	-1.14854e+06	16.3149	1.13098	917	0.915823	4.60295
1111	1	100	-1.14826e+06	16.2763	1.13868	889	0.91602	4.52005
1112	1	100	-1.1483e+06	16.2667	1.12558	907	0.912705	4.50989
1113	1	100	-1.14794e+06	16.2623	1.13239	905	0.908554	4.49568
1114	1	100	-1.14778e+06	16.242	1.1387	891	0.91201	4.56529
1115	1	100	-1.14802e+06	16.4741	1.14309	900	0.915422	4.49947
1116	1	100	-1.14866e+06	16.3632	1.15153	901	0.913891	4.5646
1117	1	100	-1.14856e+06	16.1513	1.14114	886	0.912867	4.55882
1118	1	100	-1.14867e+06	16.2489	1.13797	891	0.916511	4.55348
1119	1	100	-1.14806e+06	16.1542	1.14229	900	0.915311	4.57816
1120	1	100	-1.14839e+06	16.0937	1.14415	914	0.917008	4.48195
1121	1	100	-1.14854e+06	16.1106	1.14962	914	0.915715	4.54862
1122	1	100	-1.14841e+06	16.1358	1.15197	914	0.915094	4.7377
1123	1	100	-1.14835e+06	16.1988	1.14795	911	0.915258	4.54756
1124	1	100	-1.14873e+06	16.2612	1.13248	926	0.918764	4.6224
1125	1	100	-1.14855e+06	16.2936	1.12301	943	0.919521	4.60456
1126	1	100	-1.1491e+06	16.1645	1.12615	914	0.919395	4.63051
1127	1	100	-1.14867e+06	16.1627	1.12962	914	0.917119	4.70525
1128	1	100	-1.1486e+06	16.0952	1.1279	898	0.91357	4.63106
1129	1	100	-1.14801e+06	16.2266	1.12742	904	0.91539	4.59776
1130	1	100	-1.14823e+06	16.1577	1.12913	890	0.914111	4.66064
1131	1	100	-1.14832e+06	16.1792	1.13096	897	0.917102	4.72731
1132	1	100	-1.14851e+06	16.1877	1.1207	910	0.912708	4.70025
1133	1	100	-1.14908e+06	16.1962	1.12879	889	0.914602	4.63924
1134	1	100	-1.1484e+06	16.342	1.13869	900	0.912681	4.56036
1135	1	100	-1.14824e+06	16.2126	1.13754	911	0.911765	4.59851
1136	1	100	-1.14801e+06	16.1398	1.13814	905	0.911128	4.62943
1137	1	100	-1.14805e+06	16.2308	1.14041	903	0.913305	4.62775
1138	1	100	-1.14831e+06	16.2917	1.14777	896	0.91345	4.69315
1139	1	100	-1.14782e+06	16.2976	1.15824	904	0.912786	4.57805
1140	1	100	-1.14765e+06	16.1759	1.15637	915	0.909459	4.66951
1141	1	100	-1.14779e+06	16.3661	1.15423	921	0.912615	4.58587
1142	1	100	-1.14796e+06	16.3234	1.15322	918	0.9106	4.6292
1143	1	100	-1.14822e+06	16.3426	1.16402	925	0.911693	4.63525
1144	1	100	-1.14826e+06	16.227	1.1658	906	0.909955	4.55411
1145	1	100	-1.14803e+06	16.2089	1.1736	923	0.909882	4.61048
1146	1	100	-1.14748e+06	16.1389	1.17734	939	0.909735	4.628
1147	1	100	-1.14803e+06	16.1359	1.17777	937	0.908384	4.62554
1148	1	100	-1.14739e+06	16.1526	1.17059	919	0.909356	4.64681
1149	1	100	-1.14749e+06	16.13	1.17645	913	0.910442	4.62905
1150	1	100	-1.14778e+06	16.1278	1.16582	919	0.908868	4.56022
1151	1	100	-1.14779e+06	16.1968	1.15889	902	0.910828	4.70443
1152	1	100	-1.14826e+06	16.1451	1.16236	901	0.90939	4.66619
1153	1	100	-1.14816e+06	16.2002	1.16114	901	0.912965	4.57884
1154	1	100	-1.14835e+06	16.158	1.1614	910	0.910851	4.63576
1155	1	100	-1.1485e+06	16.2224	1.16236	904	0.914852	4.69935
1156	1	100	-1.14858e+06	16.0819	1.15527	913	0.912555	4.68433
1157	1	100	-1.14845e+06	16.1816	1.15407	922	0.913426	4.73124
1158	1	100	-1.14812e+06	16.1691	1.15655	918	0.912407	4.69108
1159	1	100	-1.14833e+06	16.3238	1.15042	912	0.914989	4.73282
1160	1	100	-1.1475e+06	16.321	1.15845	943	0.91135	4.53614
1161	1	100	-1.14752e+06	16.1316	1.15518	948	0.910658	4.56026
1162	1	100	-1.14761e+06	16.1407	1.15544	945	0.910107	4.60269
1163	1	100	-1.14752e+06	16.0931	1.15186	961	0.912679	4.49202
1164	1	100	-1.14801e+06	16.2384	1.14959	958	0.917009	4.54132
1165	1	100	-1.14756e+06	16.139	1.14968	958	0.914455	4.62401
1166	1	100	-1.14764e+06	16.1232	1.16314	958	0.91515	4.74609
1167	1	100	-1.14792e+06	16.1507	1.16777	942	0.913182	4.56487
1168	1	100	-1.14774e+06	16.0658	1.15263	945	0.911608	4.5385
1169	1	100	-1.14853e+06	16.1573	1.153	938	0.917764	4.58418
1170	1	100	-1.148e+06	16.1408	1.15087	951	0.913097	4.66581
1171	1	100	-1.14826e+06	16.1652	1.14415	941	0.915464	4.6803
1172	1	100	-1.14778e+06	16.2702	1.13398	949	0.91409	4.72617
1173	1	100	-1.14768e+06	16.3373	1.12839	953	0.912673	4.62905
1174	1	100	-1.14843e+06	16.3117	1.11735	956	0.913167	4.60345
1175	1	100	-1.14867e+06	16.2001	1.1107	930	0.918003	4.58975
1176	1	100	-1.14831e+06	16.246	1.11793	931	0.916312	4.53574
1177	1	100	-1.14803e+06	16.3598	1.1136	942	0.915524	4.42404
1178	1	100	-1.14792e+06	16.466	1.11243	966	0.917574	4.56127
1179	1	100	-1.14803e+06	16.2816	1.11037	957	0.913436	4.54286
1180	1	100	-1.14825e+06	16.4204	1.10449	951	0.917166	4.6512
1181	1	100	-1.14804e+06	16.3874	1.10631	971	0.914962	4.57039
1182	1	100	-1.14756e+06	16.2441	1.10998	972	0.916327	4.61484
1183	1	100	-1.14787e+06	16.2836	1.1103	956	0.916326	4.51255
1184	1	100	-1.14758e+06	16.1693	1.11231	949	0.91552	4.66285
1185	1	100	-1.14806e+06	16.3667	1.11488	970	0.920344	4.69987
1186	1	100	-1.14816e+06	16.2774	1.1117	956	0.917385	4.58758
1187	1	100	-1.14833e+06	16.3189	1.10588	950	0.916284	4.65071
1188	1	100	-1.14824e+06	16.1772	1.11039	942	0.913569	4.64122
1189	1	100	-1.14864e+06	16.2777	1.1027	947	0.916176	4.65959
1190	1	100	-1.14835e+06	16.2503	1.10808	949	0.919185	4.5521
1191	1	100	-1.14798e+06	16.3662	1.10482	929	0.920639	4.44989
1192	1	100	-1.14751e+06	16.2679	1.10801	943	0.915786	4.58067
1193	1	100	-1.14766e+06	16.4084	1.10051	956	0.917522	4.48102
1194	1	100	-1.14793e+06	16.4055	1.10155	962	0.916055	4.58323
1195	1	100	-1.14797e+06	16.3557	1.10795	951	0.916068	4.59257
1196	1	100	-1.14795e+06	16.3385	1.10928	944	0.914891	4.52575
1197	1	100	-1.14754e+06	16.4219	1.11134	926	0.913763	4.5441
1198	1	100	-1.14863e+06	16.3398	1.11008	924	0.917192	4.5759
1199	1	100	-1.14812e+06	16.3853	1.10963	927	0.920012	4.58395
1200	1	100	-1.14803e+06	16.224	1.13056	927	0.919252	4.71106
1201	1	100	-1.14863e+06	16.1287	1.1297	920	0.920042	4.70515
1202	1	100	-1.14891e+06	16.2862	1.11567	922	0.920713	4.61562
1203	1	100	-1.14848e+06	16.227	1.12154	925	0.917806	4.56517
1204	1	100	-1.14888e+06	16.1269	1.12357	930	0.919419	4.6946
1205	1	100	-1.1487e+06	16.1168	1.11223	935	0.919157	4.70682
1206	1	100	-1.14814e+06	15.9259	1.12546	934	0.914125	4.60304
1207	1	100	-1.14824e+06	15.9089	1.12799	912	0.917824	4.66519
1208	1	100	-1.14879e+06	16.0637	1.13955	919	0.917833	4.63701
1209	1	100	-1.14838e+06	16.0054	1.13841	902	0.916145	4.61248
1210	1	100	-1.14855e+06	16.0599	1.12664	910	0.918059	4.72256
1211	1	100	-1.14804e+06	16.1507	1.1301	939	0.916601	4.66376
1212	1	100	-1.14817e+06	16.0633	1.13879	936	0.915088	4.84691
1213	1	100	-1.14805e+06	16.0882	1.15081	937	0.915772	4.65024
1214	1	100	-1.14821e+06	16.2521	1.13597	920	0.915179	4.60798
1215	1	100	-1.1483e+06	16.2061	1.14172	941	0.911614	4.73422
1216	1	100	-1.1483e+06	16.265	1.14671	907	0.914583	4.77061
1217	1	100	-1.14813e+06	16.2019	1.14258	930	0.912522	4.68418
1218	1	100	-1.14815e+06	16.1616	1.14676	921	0.915131	4.63486
1219	1	100	-1.14811e+06	16.231	1.13924	935	0.911158	4.78805
1220	1	100	-1.14861e+06	16.1256	1.13193	940	0.913647	4.7447
1221	1	100	-1.14835e+06	16.2448	1.11948	942	0.915984	4.66271
1222	1	100	-1.14846e+06	16.275	1.12114	922	0.916514	4.77944
1223	1	100	-1.14878e+06	16.1497	1.11492	914	0.917277	4.75066
1224	1	100	-1.14842e+06	16.175	1.12117	945	0.915825	4.73111
1225	1	100	-1.14868e+06	16.1731	1.12386	926	0.914578	4.67215
1226	1	100	-1.14883e+06	16.2213	1.12198	930	0.91847	4.69171
1227	1	100	-1.14831e+06	16.1594	1.12242	926	0.914493	4.61199
1228	1	100	-1.14856e+06	16.322	1.12449	948	0.916909	4.63298
1229	1	100	-1.14792e+06	16.2054	1.11407	949	0.918204	4.71323
1230	1	100	-1.14915e+06	16.1961	1.11195	943	0.918636	4.78316
1231	1	100	-1.14886e+06	16.2336	1.11623	936	0.915093	4.76507
1232	1	100	-1.14884e+06	16.2143	1.10672	946	0.920641	4.8301
1233	1	100	-1.14865e+06	16.204	1.10757	954	0.920402	4.77952
1234	1	100	-1.14907e+06	16.2401	1.09966	942	0.919769	4.75248
1235	1	100	-1.14892e+06	16.2694	1.09281	939	0.918579	4.68744
1236	1	100	-1.14862e+06	16.2875	1.0849	943	0.922888	4.76324
1237	1	100	-1.14857e+06	16.1696	1.09877	926	0.919012	4.60904
1238	1	100	-1.14876e+06	16.149	1.10722	926	0.919767	4.62531
1239	1	100	-1.1493e+06	16.3596	1.10559	907	0.923047	4.67842
1240	1	100	-1.14884e+06	16.3421	1.11686	931	0.920919	4.77192
1241	1	100	-1.14899e+06	16.1324	1.12096	921	0.921008	4.72048
1242	1	100	-1.14861e+06	16.3082	1.10831	933	0.918008	4.67017
1243	1	100	-1.14842e+06	16.2713	1.1097	927	0.919959	4.6699
1244	1	100	-1.14887e+06	16.3622	1.11305	916	0.92191	4.76274
1245	1	100	-1.14867e+06	16.4365	1.11224	936	0.919836	4.80697
1246	1	100	-1.14862e+06	16.2236	1.1145	936	0.919097	4.67174
1247	1	100	-1.14881e+06	15.9876	1.11758	929	0.923849	4.77105
1248	1	100	-1.14935e+06	16.1569	1.12651	921	0.920311	4.66599
1249	1	100	-1.14895e+06	16.1977	1.10399	895	0.922155	4.64635
1250	1	100	-1.14912e+06	16.1781	1.1077	893	0.922442	4.61079
1251	1	100	-1.14949e+06	16.1992	1.10088	896	0.923066	4.67614
1252	1	100	-1.14915e+06	16.3342	1.09938	910	0.924299	4.70361
1253	1	100	-1.14936e+06	16.25	1.10394	919	0.921927	4.59084
1254	1	100	-1.14909e+06	16.0772	1.11442	902	0.920688	4.57896
1255	1	100	-1.14943e+06	16.2343	1.11527	900	0.918504	4.62879
1256	1	100	-1.14888e+06	16.338	1.11614	908	0.918779	4.73049
1257	1	100	-1.14917e+06	16.3027	1.11635	915	0.918987	4.61309
1258	1	100	-1.14907e+06	16.1442	1.12989	921	0.914331	4.60129
1259	1	100	-1.14888e+06	16.2796	1.12331	919	0.921373	4.62994
1260	1	100	-1.14865e+06	16.1943	1.12415	922	0.917793	4.64045
1261	1	100	-1.14841e+06	16.1935	1.13136	912	0.916434	4.68134
1262	1	100	-1.14872e+06	16.2755	1.13073	930	0.918601	4.65478
1263	1	100	-1.14791e+06	16.2795	1.13782	926	0.913741	4.57106
1264	1	100	-1.14769e+06	16.3709	1.1348	922	0.91521	4.55654
1265	1	100	-1.1483e+06	16.2625	1.13372	916	0.914398	4.56713
1266	1	100	-1.14877e+06	16.114	1.13443	910	0.913753	4.47421
1267	1	100	-1.14866e+06	16.098	1.1441	910	0.915082	4.52437
1268	1	100	-1.14842e+06	16.2424	1.14755	932	0.919255	4.49644
1269	1	100	-1.14785e+06	16.1694	1.14345	921	0.91482	4.56542
1270	1	100	-1.1482e+06	16.11	1.14394	938	0.914451	4.51531
1271	1	100	-1.14797e+06	16.1601	1.14776	943	0.915625	4.55533
1272	1	100	-1.14811e+06	16.2103	1.13654	952	0.913181	4.60895
1273	1	100	-1.14796e+06	16.2512	1.1324	944	0.910801	4.60867
1274	1	100	-1.14797e+06	16.2032	1.13456	955	0.912946	4.50498
1275	1	100	-1.14822e+06	16.4391	1.14092	950	0.914279	4.62052
1276	1	100	-1.1477e+06	16.4815	1.12698	965	0.912487	4.54046
1277	1	100	-1.14754e+06	16.3523	1.1375	939	0.910664	4.63882
1278	1	100	-1.14809e+06	16.2898	1.11328	956	0.915374	4.57115
1279	1	100	-1.1477e+06	16.3832	1.12835	952	0.916634	4.63418
1280	1	100	-1.1484e+06	16.2459	1.12793	937	0.915531	4.61459
1281	1	100	-1.1485e+06	16.4107	1.12316	951	0.920156	4.68856
1282	1	100	-1.14842e+06	16.3013	1.11951	942	0.915235	4.73365
1283	1	100	-1.14849e+06	16.2217	1.11966	933	0.916172	4.65453
1284	1	100	-1.14845e+06	16.1386	1.12172	939	0.914492	4.56651
1285	1	100	-1.14881e+06	16.19	1.12247	936	0.917474	4.67941
1286	1	100	-1.14864e+06	16.1718	1.12356	905	0.917313	4.60718
1287	1	100	-1.14864e+06	16.0918	1.12579	923	0.917448	4.59704
1288	1	100	-1.14879e+06	16.1583	1.12177	900	0.916694	4.49214
1289	1	100	-1.14853e+06	16.1409	1.11842	911	0.91747	4.63273
1290	1	100	-1.14916e+06	16.0215	1.12007	909	0.920591	4.63049
1291	1	100	-1.14888e+06	16.0572	1.11581	911	0.92237	4.64817
1292	1	100	-1.14911e+06	16.0076	1.10633	915	0.92195	4.69452
1293	1	100	-1.14866e+06	16.1364	1.09974	925	0.922638	4.55489
1294	1	100	-1.14925e+06	16.1705	1.11143	914	0.920059	4.59099
1295	1	100	-1.1497e+06	16.227	1.10462	901	0.922094	4.50772
1296	1	100	-1.14888e+06	16.2919	1.11707	902	0.92158	4.52273
1297	1	100	-1.14887e+06	16.2246	1.1164	895	0.920584	4.62114
1298	1	100	-1.14926e+06	16.1256	1.10818	908	0.921317	4.68008
1299	1	100	-1.14933e+06	16.2172	1.10028	906	0.921782	4.66321
1300	1	100	-1.14949e+06	16.4238	1.10002	921	0.923127	4.74107
1301	1	100	-1.14899e+06	16.2736	1.10682	913	0.918733	4.68634
1302	1	100	-1.14952e+06	16.3175	1.08724	921	0.922211	4.80154
1303	1	100	-1.14908e+06	16.2994	1.08845	909	0.924004	4.64986
1304	1	100	-1.1494e+06	16.1212	1.08963	906	0.92472	4.65203
1305	1	100	-1.149e+06	16.1195	1.09829	909	0.920532	4.59304
1306	1	100	-1.14958e+06	16.2116	1.09843	906	0.921126	4.66408
1307	1	100	-1.14973e+06	16.0734	1.11076	912	0.921226	4.591
1308	1	100	-1.14963e+06	16.1525	1.11757	914	0.918786	4.60329
1309	1	100	-1.14987e+06	16.0904	1.12397	900	0.920709	4.67306
1310	1	100	-1.14873e+06	16.0983	1.12772	911	0.916049	4.56224
1311	1	100	-1.14914e+06	16.1456	1.13149	904	0.91771	4.52263
1312	1	100	-1.14851e+06	16.0788	1.13178	897	0.914437	4.53188
1313	1	100	-1.14847e+06	16.1396	1.13131	911	0.915888	4.56515
1314	1	100	-1.1488e+06	16.107	1.13746	904	0.917045	4.60152
1315	1	100	-1.14867e+06	16.1654	1.12973	906	0.917304	4.63367
1316	1	100	-1.14893e+06	16.1495	1.12127	888	0.918612	4.73704
1317	1	100	-1.14843e+06	16.2885	1.11916	898	0.913916	4.60775
1318	1	100	-1.14942e+06	16.2643	1.12487	869	0.916769	4.6405
1319	1	100	-1.14856e+06	16.1783	1.12643	885	0.914949	4.57853
1320	1	100	-1.1489e+06	16.2074	1.13163	880	0.915724	4.65949
1321	1	100	-1.14887e+06	16.3271	1.12563	902	0.916049	4.64278
1322	1	100	-1.14877e+06	16.3045	1.12111	904	0.914086	4.56221
1323	1	100	-1.14878e+06	16.3304	1.12018	926	0.916376	4.60413
1324	1	100	-1.1493e+06	16.1903	1.13092	916	0.916687	4.62207
1325	1	100	-1.1491e+06	16.1901	1.1301	910	0.914844	4.68039
1326	1	100	-1.14924e+06	16.2402	1.14046	913	0.915612	4.8023
1327	1	100	-1.14907e+06	16.1368	1.13743	908	0.914941	4.62937
1328	1	100	-1.14913e+06	16.2302	1.13191	906	0.915081	4.57812
1329	1	100	-1.14871e+06	16.1908	1.12502	893	0.916571	4.67861
1330	1	100	-1.1489e+06	16.175	1.12762	908	0.915534	4.66046
1331	1	100	-1.14864e+06	16.0951	1.13987	909	0.916542	4.60989
1332	1	100	-1.14876e+06	16.161	1.13152	904	0.918163	4.73391
1333	1	100	-1.14881e+06	16.2655	1.13895	923	0.916579	4.75441
1334	1	100	-1.14885e+06	16.1717	1.13482	901	0.915965	4.70624
1335	1	100	-1.14832e+06	16.1728	1.1432	912	0.913767	4.70865
1336	1	100	-1.14871e+06	16.2552	1.13351	906	0.918731	4.61786
1337	1	100	-1.14872e+06	16.2574	1.11651	891	0.915149	4.65182
1338	1	100	-1.14861e+06	16.3572	1.11262	894	0.918209	4.60566
1339	1	100	-1.14916e+06	16.285	1.12263	893	0.920146	4.67943
1340	1	100	-1.14907e+06	16.1157	1.12319	899	0.917629	4.74879
1341	1	100	-1.14878e+06	16.1259	1.12219	907	0.92222	4.71561
1342	1	100	-1.14912e+06	16.1271	1.1113	892	0.919219	4.61242
1343	1	100	-1.14862e+06	16.0603	1.11587	889	0.917399	4.64502
1344	1	100	-1.14899e+06	16.0935	1.1204	917	0.92075	4.65174
1345	1	100	-1.14878e+06	16.0758	1.11772	914	0.91819	4.66326
1346	1	100	-1.14888e+06	16.1072	1.1186	906	0.923065	4.63544
1347	1	100	-1.14878e+06	16.2395	1.11937	883	0.921024	4.6038
1348	1	100	-1.14854e+06	16.1167	1.11752	915	0.918061	4.65041
1349	1	100	-1.14866e+06	16.1149	1.12715	908	0.921085	4.61186
1350	1	100	-1.14859e+06	16.1936	1.12848	917	0.920473	4.67188
1351	1	100	-1.14869e+06	16.163	1.1203	908	0.917815	4.70604
1352	1	100	-1.14919e+06	16.0555	1.12919	903	0.920054	4.62595
1353	1	100	-1.14865e+06	15.9388	1.13596	914	0.91498	4.62957
1354	1	100	-1.14881e+06	16.0307	1.13306	913	0.918539	4.61825
1355	1	100	-1.14871e+06	16.0335	1.12329	904	0.919686	4.69388
1356	1	100	-1.14857e+06	16.2464	1.13281	907	0.917588	4.62415
1357	1	100	-1.14876e+06	16.1457	1.13261	892	0.919276	4.55042
1358	1	100	-1.14907e+06	16.1177	1.13825	904	0.918846	4.66596
1359	1	100	-1.14911e+06	16.1059	1.14152	895	0.91927	4.57394
1360	1	100	-1.14928e+06	16.1082	1.13945	901	0.918107	4.62596
1361	1	100	-1.14902e+06	16.1654	1.12371	913	0.918901	4.48891
1362	1	100	-1.14891e+06	16.0961	1.13017	908	0.918981	4.62068
1363	1	100	-1.14859e+06	16.1474	1.12625	917	0.918647	4.56632
1364	1	100	-1.14902e+06	16.0973	1.1308	907	0.916478	4.67884
1365	1	100	-1.14856e+06	15.9761	1.13661	911	0.916161	4.55817
1366	1	100	-1.14867e+06	16.1023	1.13674	899	0.919698	4.66104
1367	1	100	-1.14916e+06	15.9632	1.1307	901	0.919483	4.65182
1368	1	100	-1.14981e+06	15.9923	1.13728	913	0.923258	4.66361
1369	1	100	-1.14975e+06	15.8733	1.13189	919	0.924353	4.77315
1370	1	100	-1.14911e+06	15.8233	1.13416	918	0.924727	4.6436
1371	1	100	-1.14967e+06	15.8976	1.13222	913	0.923222	4.65953
1372	1	100	-1.14976e+06	16.0555	1.12803	902	0.927007	4.52411
1373	1	100	-1.14909e+06	15.9594	1.13289	915	0.920545	4.59599
1374	1	100	-1.14935e+06	15.9588	1.1302	911	0.919568	4.60089
1375	1	100	-1.14946e+06	16.1316	1.12864	927	0.917767	4.61597
1376	1	100	-1.14936e+06	16.2109	1.12562	901	0.921345	4.52842
1377	1	100	-1.14878e+06	16.192	1.11901	896	0.920843	4.62171
1378	1	100	-1.14872e+06	16.2356	1.11358	905	0.915746	4.51646
1379	1	100	-1.1494e+06	16.2849	1.11812	901	0.921229	4.59657
1380	1	100	-1.14872e+06	16.2279	1.12564	902	0.919625	4.63062
1381	1	100	-1.14879e+06	16.2796	1.12344	917	0.91867	4.54238
1382	1	100	-1.1489e+06	16.2306	1.13319	928	0.918906	4.53294
1383	1	100	-1.14836e+06	16.2972	1.12924	902	0.918246	4.53368
1384	1	100	-1.14904e+06	16.1305	1.12789	913	0.917561	4.57583
1385	1	100	-1.14875e+06	16.2381	1.11777	910	0.919971	4.45796
1386	1	100	-1.14898e+06	16.2468	1.11931	922	0.920506	4.59256
1387	1	100	-1.14848e+06	16.0644	1.12509	906	0.917102	4.63881
1388	1	100	-1.14876e+06	16.0534	1.13091	930	0.91597	4.58773
1389	1	100	-1.1495e+06	16.0452	1.14037	920	0.917266	4.48887
1390	1	100	-1.14881e+06	16.1112	1.12927	905	0.91792	4.46214
1391	1	100	-1.14895e+06	16.1801	1.12574	933	0.920513	4.55555
1392	1	100	-1.1479e+06	16.1104	1.12448	926	0.916071	4.58132
1393	1	100	-1.14858e+06	16.1229	1.118	921	0.916747	4.57499
1394	1	100	-1.14892e+06	16.2177	1.12514	904	0.918898	4.62302
1395	1	100	-1.14855e+06	16.236	1.11158	891	0.918587	4.54777
1396	1	100	-1.14843e+06	16.2035	1.12648	900	0.921217	4.5861
1397	1	100	-1.1483e+06	16.0584	1.11724	903	0.916583	4.44645
1398	1	100	-1.14858e+06	16.0837	1.11958	907	0.921313	4.47506
1399	1	100	-1.14889e+06	16.1773	1.12209	925	0.92043	4.56676
1400	1	100	-1.14838e+06	16.1907	1.12182	921	0.918799	4.60723
1401	1	100	-1.14837e+06	16.3337	1.12089	930	0.916504	4.58471
1402	1	100	-1.14907e+06	16.179	1.12954	937	0.917953	4.52717
1403	1	100	-1.14852e+06	16.1655	1.13171	921	0.916819	4.55042
1404	1	100	-1.1484e+06	16.1516	1.12331	929	0.916648	4.64628
1405	1	100	-1.1485e+06	16.2195	1.12161	924	0.91645	4.60401
1406	1	100	-1.14864e+06	16.2042	1.11756	916	0.917184	4.45829
1407	1	100	-1.14891e+06	16.1946	1.11908	913	0.92119	4.56897
1408	1	100	-1.14871e+06	16.17	1.12441	902	0.91478	4.53309
1409	1	100	-1.14862e+06	16.2257	1.12353	931	0.91718	4.62937
1410	1	100	-1.14808e+06	16.1852	1.1281	935	0.9161	4.59446
1411	1	100	-1.148e+06	16.2647	1.12217	951	0.917989	4.65223
1412	1	100	-1.14762e+06	16.2251	1.12413	938	0.914317	4.62079
1413	1	100	-1.14778e+06	16.366	1.12878	941	0.9174	4.67923
1414	1	100	-1.14862e+06	16.3344	1.12686	940	0.916584	4.58288
1415	1	100	-1.14845e+06	16.4057	1.11903	937	0.917978	4.57514
1416	1	100	-1.14852e+06	16.1431	1.11647	922	0.919745	4.64209
1417	1	100	-1.14895e+06	16.1637	1.11258	933	0.920364	4.58973
1418	1	100	-1.1488e+06	16.2073	1.11411	934	0.921445	4.61654
1419	1	100	-1.14864e+06	16.2658	1.11547	936	0.921416	4.65573
1420	1	100	-1.1485e+06	16.1605	1.12672	930	0.921166	4.63505
1421	1	100	-1.14825e+06	16.0564	1.11827	932	0.916067	4.67551
1422	1	100	-1.14854e+06	16.1044	1.11239	918	0.92121	4.7139
1423	1	100	-1.14847e+06	16.296	1.12281	923	0.919178	4.61536
1424	1	100	-1.14808e+06	16.1995	1.12494	938	0.917422	4.59986
1425	1	100	-1.14811e+06	16.323	1.11787	958	0.919244	4.60646
1426	1	100	-1.1486e+06	16.1579	1.1341	940	0.916619	4.47736
1427	1	100	-1.14795e+06	16.0821	1.13635	922	0.913422	4.47869
1428	1	100	-1.14775e+06	16.0781	1.13253	921	0.916911	4.57225
1429	1	100	-1.14823e+06	16.1663	1.13757	929	0.916726	4.51844
1430	1	100	-1.14864e+06	16.2565	1.14234	934	0.919033	4.44787
1431	1	100	-1.14832e+06	16.1624	1.15323	928	0.918366	4.43758
1432	1	100	-1.14763e+06	16.117	1.14337	944	0.915675	4.4251
1433	1	100	-1.14761e+06	16.1879	1.15248	946	0.913936	4.51234
1434	1	100	-1.14788e+06	16.1757	1.13968	926	0.913993	4.56346
1435	1	100	-1.14771e+06	16.3035	1.13617	930	0.914563	4.47963
1436	1	100	-1.1477e+06	16.3787	1.12807	926	0.917058	4.44481
1437	1	100	-1.14747e+06	16.0774	1.1208	912	0.916962	4.56555
1438	1	100	-1.14749e+06	16.1657	1.12601	930	0.916142	4.54388
1439	1	100	-1.14767e+06	16.0672	1.14059	933	0.916814	4.41885
1440	1	100	-1.14801e+06	16.0986	1.13533	927	0.917895	4.52323
1441	1	100	-1.14763e+06	16.2292	1.13109	931	0.91661	4.44295
1442	1	100	-1.14739e+06	16.1333	1.13804	960	0.916025	4.55745
1443	1	100	-1.14703e+06	16.2535	1.12801	971	0.916481	4.52506
1444	1	100	-1.14728e+06	16.1211	1.12497	962	0.916608	4.5195
1445	1	100	-1.1477e+06	16.1655	1.12493	967	0.917767	4.52775
1446	1	100	-1.14719e+06	16.1389	1.13979	960	0.91516	4.51705
1447	1	100	-1.14705e+06	16.128	1.14128	959	0.914789	4.48426
1448	1	100	-1.14775e+06	16.1197	1.12908	960	0.916152	4.48148
1449	1	100	-1.14821e+06	16.0659	1.13707	952	0.917491	4.4922
1450	1	100	-1.14759e+06	16.1089	1.13369	948	0.917367	4.63254
1451	1	100	-1.14747e+06	16.0386	1.13085	960	0.918117	4.52807
1452	1	100	-1.14754e+06	16.0337	1.1341	935	0.917421	4.48651
1453	1	100	-1.14791e+06	16.1282	1.143	934	0.920023	4.41304
1454	1	100	-1.14765e+06	16.0429	1.14536	933	0.912038	4.55752
1455	1	100	-1.14756e+06	16.1029	1.13859	920	0.913982	4.58202
1456	1	100	-1.14754e+06	16.2277	1.13878	950	0.916234	4.63379
1457	1	100	-1.14817e+06	16.3112	1.13558	933	0.917746	4.70424
1458	1	100	-1.14814e+06	16.2027	1.1465	931	0.919585	4.59594
1459	1	100	-1.14769e+06	16.1464	1.14425	939	0.919349	4.6116
1460	1	100	-1.14785e+06	16.1855	1.14113	940	0.914468	4.60124
1461	1	100	-1.14767e+06	16.242	1.14021	945	0.915242	4.61729
1462	1	100	-1.14744e+06	16.1897	1.1471	930	0.916537	4.58848
1463	1	100	-1.1475e+06	16.248	1.13844	942	0.915226	4.59445
1464	1	100	-1.14764e+06	16.2161	1.12734	921	0.91516	4.58604
1465	1	100	-1.14763e+06	16.2857	1.11752	934	0.917077	4.63569
1466	1	100	-1.14819e+06	16.2174	1.11113	929	0.91622	4.62648
1467	1	100	-1.14854e+06	16.154	1.11419	936	0.918694	4.60794
1468	1	100	-1.14838e+06	16.1978	1.11535	931	0.919809	4.5625
1469	1	100	-1.14811e+06	16.2309	1.11254	928	0.919651	4.63327
1470	1	100	-1.1485e+06	16.2602	1.10224	926	0.921767	4.53793
1471	1	100	-1.14867e+06	16.2415	1.12139	928	0.918859	4.69896
1472	1	100	-1.14823e+06	16.2937	1.12043	918	0.918012	4.6929
1473	1	100	-1.14888e+06	16.2183	1.11841	927	0.919826	4.63005
1474	1	100	-1.14794e+06	16.2327	1.12602	911	0.919489	4.5892
1475	1	100	-1.14834e+06	16.2168	1.12842	924	0.921294	4.53523
1476	1	100	-1.1483e+06	16.1988	1.12081	925	0.920227	4.53934
1477	1	100	-1.14859e+06	16.1726	1.10321	915	0.92053	4.60763
1478	1	100	-1.14854e+06	16.238	1.10532	920	0.920359	4.48898
1479	1	100	-1.14871e+06	16.11	1.10372	904	0.919867	4.54499
1480	1	100	-1.14933e+06	16.2361	1.10194	882	0.921664	4.57678
1481	1	100	-1.14822e+06	16.2407	1.09675	900	0.918639	4.56299
1482	1	100	-1.14882e+06	16.1681	1.10464	912	0.921094	4.62169
1483	1	100	-1.14853e+06	16.254	1.09717	906	0.922113	4.55879
1484	1	100	-1.1483e+06	16.2415	1.09795	918	0.919777	4.47565
1485	1	100	-1.14922e+06	16.3462	1.0953	916	0.92685	4.59163
1486	1	100	-1.1491e+06	16.2892	1.09003	916	0.924653	4.44425
1487	1	100	-1.1487e+06	16.2445	1.09183	925	0.92552	4.44728
1488	1	100	-1.14867e+06	16.1819	1.1057	909	0.925678	4.46182
1489	1	100	-1.14822e+06	16.166	1.108	918	0.922248	4.54619
1490	1	100	-1.14854e+06	16.0789	1.111	925	0.923387	4.5584
1491	1	100	-1.14841e+06	16.1619	1.10284	930	0.921947	4.45074
1492	1	100	-1.14877e+06	16.1133	1.08716	932	0.923733	4.569
1493	1	100	-1.148e+06	16.1535	1.09466	926	0.916607	4.39903
1494	1	100	-1.14764e+06	16.3037	1.10269	932	0.916911	4.39855
1495	1	100	-1.14789e+06	16.2465	1.10079	948	0.916071	4.34864
1496	1	100	-1.14782e+06	16.3434	1.1035	940	0.918112	4.47998
1497	1	100	-1.14803e+06	16.2069	1.124	937	0.916062	4.62838
1498	1	100	-1.14724e+06	16.3182	1.12311	930	0.914584	4.5872
1499	1	100	-1.14697e+06	16.3708	1.11856	937	0.916341	4.48765
1500	1	100	-1.14766e+06	16.4052	1.11153	923	0.913736	4.34499
1501	1	100	-1.14728e+06	16.3489	1.10718	913	0.916184	4.43714
1502	1	100	-1.1477e+06	16.2164	1.10638	927	0.914692	4.49423
1503	1	100	-1.14749e+06	16.3228	1.1066	939	0.914826	4.45616
1504	1	100	-1.14765e+06	16.3079	1.11994	948	0.912812	4.60311
1505	1	100	-1.14759e+06	16.2749	1.11839	921	0.914844	4.59757
1506	1	100	-1.14748e+06	16.2893	1.11456	937	0.912753	4.51372
1507	1	100	-1.14735e+06	16.2214	1.12183	918	0.914581	4.52183
1508	1	100	-1.14778e+06	16.4158	1.12948	941	0.914093	4.60921
1509	1	100	-1.14771e+06	16.4332	1.12757	926	0.915383	4.54334
1510	1	100	-1.14769e+06	16.3689	1.12743	939	0.91767	4.56524
1511	1	100	-1.14824e+06	16.3108	1.12289	938	0.921866	4.59516
1512	1	100	-1.1483e+06	16.2834	1.12359	921	0.917736	4.55692
1513	1	100	-1.14738e+06	16.3706	1.12714	931	0.9179	4.63489
1514	1	100	-1.14744e+06	16.3407	1.12944	929	0.913682	4.59108
1515	1	100	-1.14736e+06	16.3224	1.12368	927	0.914498	4.5982
1516	1	100	-1.14723e+06	16.2907	1.12938	942	0.911339	4.61554
1517	1	100	-1.14745e+06	16.343	1.13513	952	0.910756	4.56879
1518	1	100	-1.14819e+06	16.3963	1.13057	937	0.912094	4.65352
1519	1	100	-1.14836e+06	16.29	1.13676	948	0.914518	4.66041
1520	1	100	-1.1476e+06	16.3989	1.12565	934	0.911767	4.57669
1521	1	100	-1.14814e+06	16.3335	1.1277	953	0.911024	4.52439
1522	1	100	-1.14789e+06	16.5015	1.1077	909	0.918265	4.52165
1523	1	100	-1.14801e+06	16.3747	1.10901	930	0.916998	4.63636
1524	1	100	-1.14753e+06	16.4104	1.11781	936	0.915565	4.67232
1525	1	100	-1.1475e+06	16.384	1.12116	951	0.910964	4.62639
1526	1	100	-1.14668e+06	16.3614	1.11723	951	0.914022	4.61539
1527	1	100	-1.1468e+06	16.4093	1.12189	953	0.911439	4.59452
1528	1	100	-1.14711e+06	16.5255	1.12573	964	0.912406	4.54721
1529	1	100	-1.14729e+06	16.4221	1.13321	954	0.90941	4.52209
1530	1	100	-1.14722e+06	16.383	1.12798	946	0.91038	4.58939
1531	1	100	-1.14717e+06	16.4854	1.12394	947	0.910182	4.52924
1532	1	100	-1.14713e+06	16.5311	1.11316	942	0.908643	4.49289
1533	1	100	-1.14724e+06	16.6189	1.12737	950	0.908467	4.47949
1534	1	100	-1.1471e+06	16.4708	1.13102	939	0.908968	4.37766
1535	1	100	-1.1472e+06	16.4578	1.1322	939	0.90806	4.48996
1536	1	100	-1.14679e+06	16.4147	1.13599	936	0.909696	4.46856
1537	1	100	-1.14748e+06	16.4304	1.13944	931	0.910901	4.5024
1538	1	100	-1.14759e+06	16.4599	1.14257	926	0.912876	4.56058
1539	1	100	-1.1477e+06	16.5765	1.12946	923	0.91347	4.53815
1540	1	100	-1.1478e+06	16.4753	1.12632	939	0.914733	4.48068
1541	1	100	-1.14714e+06	16.3821	1.12617	939	0.911914	4.49419
1542	1	100	-1.14723e+06	16.3865	1.12582	942	0.914955	4.51073
1543	1	100	-1.14691e+06	16.3623	1.12755	950	0.914552	4.49635
1544	1	100	-1.14714e+06	16.4119	1.14428	936	0.914466	4.49601
1545	1	100	-1.14705e+06	16.3575	1.13489	934	0.909994	4.51251
1546	1	100	-1.14693e+06	16.4206	1.13867	946	0.913054	4.51792
1547	1	100	-1.14764e+06	16.4495	1.1297	951	0.91675	4.63586
1548	1	100	-1.14749e+06	16.3839	1.11293	946	0.915909	4.4678
1549	1	100	-1.14729e+06	16.2317	1.12371	944	0.910342	4.54027
1550	1	100	-1.14752e+06	16.2217	1.12977	956	0.914363	4.41991
1551	1	100	-1.14752e+06	16.0237	1.13097	954	0.913942	4.50294
1552	1	100	-1.14788e+06	16.0772	1.13304	945	0.916961	4.42944
1553	1	100	-1.14771e+06	16.1568	1.11962	959	0.914932	4.53556
1554	1	100	-1.14772e+06	16.2936	1.11232	949	0.918121	4.56628
1555	1	100	-1.14763e+06	16.5578	1.11281	949	0.91903	4.54106
1556	1	100	-1.14766e+06	16.302	1.1126	953	0.914636	4.56067
1557	1	100	-1.1481e+06	16.356	1.11964	963	0.914487	4.56229
1558	1	100	-1.14771e+06	16.2402	1.11391	981	0.9146	4.61745
1559	1	100	-1.1478e+06	16.1406	1.11851	966	0.919944	4.57482
1560	1	100	-1.14848e+06	16.171	1.10254	973	0.920119	4.59228
1561	1	100	-1.14819e+06	16.3276	1.09936	971	0.919691	4.64034
1562	1	100	-1.14766e+06	16.3359	1.10501	958	0.918224	4.63638
1563	1	100	-1.14769e+06	16.3252	1.10367	962	0.918518	4.58957
1564	1	100	-1.14764e+06	16.3482	1.11025	972	0.918763	4.70313
1565	1	100	-1.14771e+06	16.2356	1.1156	962	0.916783	4.59858
1566	1	100	-1.14761e+06	16.2213	1.11437	954	0.916721	4.59055
1567	1	100	-1.14788e+06	16.3248	1.11664	944	0.918302	4.57691
1568	1	100	-1.14733e+06	16.3731	1.11938	967	0.916063	4.54397
1569	1	100	-1.14762e+06	16.2576	1.12021	961	0.913722	4.53497
1570	1	100	-1.14785e+06	16.1336	1.12047	948	0.913098	4.63521
1571	1	100	-1.1478e+06	16.221	1.1265	952	0.914124	4.59065
1572	1	100	-1.14719e+06	16.3118	1.1309	937	0.912483	4.60413
1573	1	100	-1.14802e+06	16.4773	1.12356	927	0.917518	4.63886
1574	1	100	-1.14779e+06	16.3016	1.12167	950	0.915222	4.64623
1575	1	100	-1.14744e+06	16.3259	1.12166	943	0.914941	4.66809
1576	1	100	-1.14749e+06	16.4112	1.12318	944	0.915902	4.60585
1577	1	100	-1.14786e+06	16.429	1.11365	947	0.915892	4.73364
1578	1	100	-1.14773e+06	16.4665	1.12297	948	0.915711	4.63077
1579	1	100	-1.14747e+06	16.4107	1.11875	941	0.918033	4.61113
1580	1	100	-1.14777e+06	16.3204	1.11186	949	0.917832	4.69774
1581	1	100	-1.14752e+06	16.3035	1.10231	943	0.916926	4.7595
1582	1	100	-1.14822e+06	16.2613	1.10092	954	0.920069	4.65854
1583	1	100	-1.1484e+06	16.2326	1.09491	951	0.921184	4.61942
1584	1	100	-1.14872e+06	16.2688	1.10216	943	0.919827	4.56625
1585	1	100	-1.14865e+06	16.1964	1.12431	967	0.916725	4.56924
1586	1	100	-1.14788e+06	16.2191	1.11704	949	0.916588	4.61832
1587	1	100	-1.14845e+06	16.1239	1.12037	943	0.916599	4.62877
1588	1	100	-1.14808e+06	16.168	1.12014	938	0.915222	4.66539
1589	1	100	-1.14819e+06	16.2277	1.11474	924	0.91682	4.60286
1590	1	100	-1.14833e+06	16.3761	1.1196	911	0.915778	4.7042
1591	1	100	-1.1478e+06	16.3513	1.12577	932	0.915186	4.67135
1592	1	100	-1.14784e+06	16.3469	1.13409	935	0.913904	4.64598
1593	1	100	-1.1481e+06	16.3641	1.13446	944	0.915623	4.80003
1594	1	100	-1.14824e+06	16.1536	1.13822	927	0.91855	4.63853
1595	1	100	-1.14836e+06	16.1809	1.13097	940	0.917856	4.71918
1596	1	100	-1.14845e+06	16.1494	1.12691	943	0.920454	4.7535
1597	1	100	-1.14854e+06	16.0586	1.12481	944	0.920228	4.63945
1598	1	100	-1.14834e+06	16.0128	1.12396	930	0.918603	4.70969
1599	1	100	-1.14827e+06	16.008	1.12029	929	0.918592	4.67942
1600	1	100	-1.14807e+06	16.051	1.134	921	0.918228	4.60016
1601	1	100	-1.14794e+06	16.0584	1.12357	938	0.916908	4.64354
1602	1	100	-1.14872e+06	16.1294	1.12954	934	0.921559	4.60765
1603	1	100	-1.14832e+06	15.9516	1.13126	918	0.918823	4.57582
1604	1	100	-1.14829e+06	16.0812	1.12539	933	0.921124	4.4654
1605	1	100	-1.14856e+06	16.182	1.12951	943	0.919489	4.47666
1606	1	100	-1.14789e+06	16.1314	1.12923	925	0.919926	4.59367
1607	1	100	-1.1483e+06	16.1823	1.11955	955	0.923341	4.56824
1608	1	100	-1.14916e+06	16.1229	1.12027	955	0.921625	4.55246
1609	1	100	-1.14895e+06	16.0651	1.12124	926	0.921229	4.64637
1610	1	100	-1.14856e+06	16.1329	1.1203	934	0.922139	4.63272
1611	1	100	-1.14888e+06	16.0565	1.11022	949	0.923548	4.7198
1612	1	100	-1.14903e+06	16.0372	1.10447	946	0.922419	4.64829
1613	1	100	-1.14873e+06	16.0761	1.11101	941	0.92342	4.53887
1614	1	100	-1.14844e+06	16.1692	1.1014	926	0.922836	4.70636
1615	1	100	-1.1487e+06	16.1589	1.0948	945	0.923552	4.64293
1616	1	100	-1.14901e+06	16.0874	1.09734	938	0.921599	4.66586
1617	1	100	-1.14915e+06	16.0907	1.10987	947	0.921555	4.62378
1618	1	100	-1.14809e+06	16.2489	1.11988	947	0.91836	4.60155
1619	1	100	-1.14832e+06	16.1479	1.13204	953	0.916198	4.65007
1620	1	100	-1.14862e+06	16.2311	1.13088	938	0.917449	4.64289
1621	1	100	-1.14839e+06	16.2265	1.14294	924	0.918601	4.68817
1622	1	100	-1.14815e+06	16.165	1.1398	940	0.917324	4.58533
1623	1	100	-1.14879e+06	16.165	1.13725	928	0.919219	4.67533
1624	1	100	-1.14879e+06	16.1221	1.13614	916	0.919018	4.57584
1625	1	100	-1.14858e+06	16.2269	1.13748	924	0.919464	4.59643
1626	1	100	-1.14783e+06	16.196	1.13527	937	0.918412	4.64466
1627	1	100	-1.14891e+06	16.1758	1.14168	937	0.919515	4.6368
1628	1	100	-1.14861e+06	16.0738	1.14257	918	0.915999	4.54154
1629	1	100	-1.14833e+06	16.0271	1.14762	906	0.916075	4.61275
1630	1	100	-1.14792e+06	15.9635	1.1552	916	0.913525	4.65132
1631	1	100	-1.14825e+06	16.0088	1.15739	915	0.914254	4.69812
1632	1	100	-1.14826e+06	16.0915	1.16956	929	0.914645	4.57379
1633	1	100	-1.14872e+06	16.0929	1.15887	920	0.916005	4.59875
1634	1	100	-1.14847e+06	15.9774	1.16949	900	0.915513	4.63482
1635	1	100	-1.14817e+06	16.0091	1.16022	900	0.914968	4.57783
1636	1	100	-1.14824e+06	15.9867	1.15055	893	0.912651	4.56878
1637	1	100	-1.14815e+06	16.0507	1.14726	898	0.915353	4.43895
1638	1	100	-1.14771e+06	16.1329	1.14847	909	0.912929	4.44275
1639	1	100	-1.14745e+06	16.0755	1.14701	891	0.914047	4.52793
1640	1	100	-1.14788e+06	16.1582	1.15151	906	0.917605	4.41144
1641	1	100	-1.14788e+06	16.0161	1.14153	911	0.914265	4.41379
1642	1	100	-1.14766e+06	16.1102	1.13556	914	0.914844	4.55307
1643	1	100	-1.14765e+06	16.1485	1.14047	903	0.915901	4.56694
1644	1	100	-1.14874e+06	15.9409	1.13513	907	0.919584	4.56215
1645	1	100	-1.14807e+06	15.9955	1.123	943	0.915321	4.51745
1646	1	100	-1.14926e+06	16.1296	1.1228	929	0.925338	4.65353
1647	1	100	-1.14895e+06	16.2271	1.11524	932	0.921653	4.61475
1648	1	100	-1.14845e+06	16.1082	1.12359	941	0.919332	4.65625
1649	1	100	-1.14897e+06	16.1604	1.11903	925	0.924119	4.71487
1650	1	100	-1.14908e+06	16.1028	1.11971	919	0.921089	4.6164
1651	1	100	-1.14855e+06	16.1014	1.12576	940	0.920077	4.59443
1652	1	100	-1.14815e+06	16.0066	1.12912	934	0.922507	4.57731
1653	1	100	-1.14765e+06	15.9641	1.13946	933	0.917981	4.58952
1654	1	100	-1.14773e+06	16.098	1.11936	932	0.916052	4.67924
1655	1	100	-1.14768e+06	16.1881	1.11433	917	0.916789	4.65439
1656	1	100	-1.14787e+06	16.2925	1.1126	931	0.91617	4.59102
1657	1	100	-1.14834e+06	16.4457	1.11237	916	0.918291	4.60774
1658	1	100	-1.1481e+06	16.2942	1.11934	925	0.915694	4.61116
1659	1	100	-1.14823e+06	16.2135	1.12293	928	0.912907	4.57256
1660	1	100	-1.14828e+06	16.3785	1.1164	917	0.91742	4.51425
1661	1	100	-1.14893e+06	16.2601	1.12305	915	0.919118	4.55547
1662	1	100	-1.14837e+06	16.2077	1.11411	921	0.919284	4.52841
1663	1	100	-1.14833e+06	16.3051	1.11863	914	0.920666	4.59267
1664	1	100	-1.14849e+06	16.1653	1.11603	931	0.922469	4.52519
1665	1	100	-1.14817e+06	16.1877	1.12772	926	0.919664	4.48909
1666	1	100	-1.14846e+06	16.2769	1.1352	928	0.920781	4.59616
1667	1	100	-1.14814e+06	16.2211	1.12713	907	0.918752	4.61344
1668	1	100	-1.1482e+06	16.1331	1.13302	909	0.921538	4.66251
1669	1	100	-1.14842e+06	16.1331	1.112	927	0.920784	4.55548
1670	1	100	-1.14863e+06	16.0858	1.12415	900	0.91722	4.70376
1671	1	100	-1.14826e+06	16.09	1.12986	922	0.913989	4.55122
1672	1	100	-1.14834e+06	16.1122	1.13618	896	0.913481	4.53929
1673	1	100	-1.14812e+06	16.2192	1.12453	902	0.918493	4.53773
1674	1	100	-1.14786e+06	16.0861	1.12254	932	0.911343	4.60576
1675	1	100	-1.14748e+06	16.1714	1.13012	921	0.912825	4.62141
1676	1	100	-1.1482e+06	16.3024	1.12541	924	0.917208	4.56981
1677	1	100	-1.14813e+06	16.292	1.12356	922	0.915011	4.58359
1678	1	100	-1.14766e+06	16.383	1.12665	929	0.914708	4.49128
1679	1	100	-1.14781e+06	16.2579	1.11526	944	0.913233	4.50862
1680	1	100	-1.1475e+06	16.2913	1.11604	921	0.916177	4.55788
1681	1	100	-1.14746e+06	16.2254	1.11888	937	0.911815	4.51321
1682	1	100	-1.14808e+06	16.3745	1.12063	917	0.911469	4.50192
1683	1	100	-1.14788e+06	16.2601	1.12386	920	0.911347	4.52832
1684	1	100	-1.1477e+06	16.3566	1.12986	950	0.914603	4.45236
1685	1	100	-1.1478e+06	16.2366	1.12307	941	0.914527	4.44845
1686	1	100	-1.14743e+06	16.264	1.12283	940	0.914384	4.51047
1687	1	100	-1.14799e+06	16.2764	1.12977	927	0.910223	4.57709
1688	1	100	-1.14757e+06	16.2637	1.13532	925	0.912954	4.51148
1689	1	100	-1.14763e+06	16.205	1.13395	936	0.912549	4.49597
1690	1	100	-1.14792e+06	16.1492	1.13809	925	0.91305	4.40373
1691	1	100	-1.14743e+06	16.278	1.13929	943	0.916113	4.386
1692	1	100	-1.14755e+06	16.3148	1.14187	936	0.912803	4.52848
1693	1	100	-1.1475e+06	16.2222	1.13267	951	0.916353	4.62666
1694	1	100	-1.1476e+06	16.2587	1.12584	940	0.915307	4.59135
1695	1	100	-1.14793e+06	16.2714	1.12419	934	0.91711	4.64011
1696	1	100	-1.14742e+06	16.3101	1.1279	961	0.914316	4.53891
1697	1	100	-1.1468e+06	16.3848	1.1337	968	0.911824	4.55998
1698	1	100	-1.14674e+06	16.3981	1.1304	988	0.91236	4.52598
1699	1	100	-1.14671e+06	16.4259	1.12729	966	0.913588	4.46173
1700	1	100	-1.1474e+06	16.3544	1.12704	981	0.912681	4.47458
1701	1	100	-1.1472e+06	16.3211	1.13237	956	0.910941	4.55232
1702	1	100	-1.14727e+06	16.3533	1.13739	965	0.911289	4.59242
1703	1	100	-1.1467e+06	16.283	1.14211	958	0.911923	4.59134
1704	1	100	-1.14735e+06	16.2525	1.13989	984	0.910093	4.54836
1705	1	100	-1.14713e+06	16.191	1.13962	957	0.912077	4.56655
1706	1	100	-1.14715e+06	16.2651	1.13933	964	0.91464	4.53416
1707	1	100	-1.14688e+06	16.2724	1.1543	957	0.910924	4.55949
1708	1	100	-1.14691e+06	16.1232	1.15639	967	0.90876	4.44292
1709	1	100	-1.14704e+06	16.3736	1.14316	954	0.914663	4.58232
1710	1	100	-1.14713e+06	16.3701	1.1361	959	0.911009	4.49593
1711	1	100	-1.14623e+06	16.4589	1.13271	957	0.909185	4.4953
1712	1	100	-1.14654e+06	16.3795	1.12979	950	0.909323	4.47406
1713	1	100	-1.1464e+06	16.3273	1.13132	951	0.907096	4.48706
1714	1	100	-1.14723e+06	16.4335	1.12794	977	0.911596	4.44193
1715	1	100	-1.14672e+06	16.3605	1.13794	988	0.913668	4.53412
1716	1	100	-1.14675e+06	16.3248	1.15206	972	0.910319	4.42341
1717	1	100	-1.14673e+06	16.3833	1.14339	980	0.91589	4.5315
1718	1	100	-1.14729e+06	16.3137	1.14842	975	0.911097	4.53734
1719	1	100	-1.14694e+06	16.2662	1.15876	948	0.912339	4.47329
1720	1	100	-1.14695e+06	16.2208	1.16848	960	0.908391	4.39661
1721	1	100	-1.14737e+06	16.3177	1.16072	953	0.911273	4.53984
1722	1	100	-1.14721e+06	16.4239	1.1551	962	0.909051	4.48447
1723	1	100	-1.14732e+06	16.285	1.14338	951	0.909914	4.4712
1724	1	100	-1.14691e+06	16.2711	1.14432	956	0.908506	4.54332
1725	1	100	-1.14691e+06	16.2405	1.14021	949	0.907672	4.49559
1726	1	100	-1.14673e+06	16.3883	1.13398	945	0.909682	4.47126
1727	1	100	-1.14638e+06	16.3947	1.13499	964	0.907116	4.46104
1728	1	100	-1.14629e+06	16.6019	1.14498	947	0.906489	4.33366
1729	1	100	-1.1465e+06	16.453	1.14985	964	0.906506	4.42116
1730	1	100	-1.14631e+06	16.5119	1.14889	969	0.905666	4.3907
1731	1	100	-1.14574e+06	16.3789	1.15102	963	0.906418	4.40812
1732	1	100	-1.14639e+06	16.4367	1.15675	973	0.905318	4.47792
1733	1	100	-1.14652e+06	16.3627	1.14899	951	0.907115	4.42101
1734	1	100	-1.14672e+06	16.4175	1.14593	939	0.908161	4.5073
1735	1	100	-1.14673e+06	16.1366	1.14976	948	0.905831	4.45368
1736	1	100	-1.14763e+06	16.2265	1.14326	962	0.911725	4.50315
1737	1	100	-1.1474e+06	16.1835	1.14534	938	0.910898	4.47734
1738	1	100	-1.14763e+06	16.1443	1.15361	930	0.911879	4.56829
1739	1	100	-1.14798e+06	16.2625	1.13676	936	0.913881	4.53876
1740	1	100	-1.14793e+06	16.1795	1.15037	914	0.909896	4.50947
1741	1	100	-1.14789e+06	16.1821	1.13855	922	0.912161	4.69404
1742	1	100	-1.14803e+06	16.3728	1.14594	925	0.915637	4.65597
1743	1	100	-1.14817e+06	16.4113	1.1455	929	0.91605	4.56274
1744	1	100	-1.1476e+06	16.3291	1.13721	950	0.913656	4.5608
1745	1	100	-1.14751e+06	16.2998	1.14336	936	0.91383	4.52458
1746	1	100	-1.14708e+06	16.2183	1.1491	962	0.910017	4.5068
1747	1	100	-1.14753e+06	16.1878	1.14196	954	0.913896	4.4541
1748	1	100	-1.14746e+06	16.0629	1.15354	944	0.913982	4.50984
1749	1	100	-1.14813e+06	16.0898	1.14859	945	0.913932	4.49393
1750	1	100	-1.14769e+06	16.1856	1.14417	954	0.915207	4.5599
1751	1	100	-1.14782e+06	16.2226	1.13118	954	0.911887	4.40683
1752	1	100	-1.14782e+06	16.0967	1.13882	933	0.915059	4.41418
1753	1	100	-1.14786e+06	16.1185	1.1374	927	0.914394	4.51723
1754	1	100	-1.1474e+06	16.1469	1.14562	931	0.917552	4.4696
1755	1	100	-1.14723e+06	16.2576	1.13107	924	0.91583	4.52981
1756	1	100	-1.14734e+06	16.2381	1.13384	935	0.914132	4.40653
1757	1	100	-1.14759e+06	16.1118	1.13588	917	0.914629	4.53836
1758	1	100	-1.1474e+06	16.161	1.13544	945	0.914255	4.58141
1759	1	100	-1.14754e+06	16.2881	1.12985	922	0.915075	4.52916
1760	1	100	-1.14739e+06	16.2495	1.12792	928	0.914319	4.48911
1761	1	100	-1.14812e+06	16.2555	1.13023	922	0.914335	4.65723
1762	1	100	-1.14797e+06	16.3118	1.12997	921	0.917079	4.58719
1763	1	100	-1.14778e+06	16.1867	1.14309	942	0.916348	4.54429
1764	1	100	-1.14759e+06	16.1797	1.13202	942	0.918695	4.45841
1765	1	100	-1.1473e+06	16.1224	1.13792	928	0.917074	4.5778
1766	1	100	-1.14816e+06	16.0233	1.13403	938	0.917897	4.68635
1767	1	100	-1.14741e+06	15.9287	1.14272	944	0.913664	4.4759
1768	1	100	-1.14744e+06	16.0307	1.14545	953	0.915581	4.47406
1769	1	100	-1.14748e+06	16.1629	1.14385	948	0.914208	4.60742
1770	1	100	-1.14795e+06	16.2892	1.1322	951	0.917777	4.42256
1771	1	100	-1.14784e+06	16.1183	1.13539	966	0.917114	4.51029
1772	1	100	-1.14751e+06	16.3203	1.1263	951	0.916709	4.61089
1773	1	100	-1.14689e+06	16.3532	1.14286	952	0.912479	4.55773
1774	1	100	-1.14721e+06	16.3329	1.14168	952	0.913458	4.5915
1775	1	100	-1.14726e+06	16.3497	1.15373	933	0.911936	4.48711
1776	1	100	-1.14762e+06	16.4917	1.14444	951	0.911425	4.45544
1777	1	100	-1.14763e+06	16.2813	1.14675	954	0.912525	4.55949
1778	1	100	-1.1479e+06	16.2669	1.13634	964	0.914305	4.59918
1779	1	100	-1.14791e+06	16.3087	1.14709	943	0.91703	4.54348
1780	1	100	-1.14754e+06	16.2669	1.14454	927	0.913357	4.5525
1781	1	100	-1.14758e+06	16.2718	1.13846	940	0.915269	4.60182
1782	1	100	-1.14766e+06	16.2832	1.14671	926	0.915282	4.56148
1783	1	100	-1.14833e+06	16.2531	1.13584	946	0.918593	4.5016
1784	1	100	-1.14766e+06	16.1059	1.13405	934	0.913623	4.42899
1785	1	100	-1.14788e+06	16.1671	1.13604	929	0.914179	4.43384
1786	1	100	-1.14787e+06	16.3711	1.13654	934	0.917069	4.47521
1787	1	100	-1.14843e+06	16.1594	1.13882	908	0.914326	4.39708
1788	1	100	-1.14806e+06	16.2768	1.13835	929	0.915507	4.50274
1789	1	100	-1.14786e+06	16.2233	1.1275	908	0.911522	4.55953
1790	1	100	-1.14801e+06	16.2439	1.13878	932	0.91499	4.44579
1791	1	100	-1.14761e+06	16.0974	1.14546	919	0.916893	4.48718
1792	1	100	-1.14786e+06	16.1788	1.1461	925	0.916923	4.51451
1793	1	100	-1.14815e+06	16.2643	1.1443	929	0.916514	4.59304
1794	1	100	-1.14794e+06	16.2237	1.14594	911	0.913482	4.60925
1795	1	100	-1.14907e+06	16.1837	1.13478	919	0.914551	4.52253
1796	1	100	-1.14889e+06	16.1334	1.14157	909	0.915639	4.69634
1797	1	100	-1.14851e+06	16.2109	1.13399	924	0.91694	4.67688
1798	1	100	-1.14834e+06	16.1273	1.13232	916	0.91408	4.55235
1799	1	100	-1.14826e+06	16.238	1.13286	921	0.919324	4.45889
1800	1	100	-1.14879e+06	16.2828	1.12166	907	0.920501	4.52115
1801	1	100	-1.14831e+06	16.3253	1.10794	919	0.920807	4.58265
1802	1	100	-1.14848e+06	16.3047	1.1257	925	0.914659	4.40105
1803	1	100	-1.14781e+06	16.3251	1.13108	933	0.915994	4.37951
1804	1	100	-1.14797e+06	16.2113	1.14544	944	0.91511	4.50673
1805	1	100	-1.14768e+06	16.2131	1.14266	949	0.914339	4.48639
1806	1	100	-1.14734e+06	16.1914	1.14922	967	0.911629	4.50387
1807	1	100	-1.14815e+06	16.2174	1.14366	938	0.916587	4.47356
1808	1	100	-1.14828e+06	16.1134	1.13881	951	0.917867	4.47979
1809	1	100	-1.14827e+06	16.0558	1.14264	946	0.917523	4.4913
1810	1	100	-1.14831e+06	16.1524	1.15245	957	0.916651	4.46565
1811	1	100	-1.1481e+06	16.1361	1.14951	943	0.91727	4.47129
1812	1	100	-1.14763e+06	15.9754	1.16004	943	0.909715	4.51853
1813	1	100	-1.14721e+06	16.0835	1.15189	934	0.914893	4.50223
1814	1	100	-1.14736e+06	16.1376	1.14293	940	0.917022	4.45878
1815	1	100	-1.14785e+06	15.9924	1.15795	930	0.916411	4.51191
1816	1	100	-1.14753e+06	16.0021	1.15001	935	0.912992	4.5424
1817	1	100	-1.14778e+06	16.0363	1.14705	918	0.913884	4.57887
1818	1	100	-1.14829e+06	16.0992	1.14277	921	0.916256	4.44135
1819	1	100	-1.14797e+06	16.1041	1.14266	922	0.912217	4.58119
1820	1	100	-1.14786e+06	16.1574	1.13776	927	0.916461	4.43809
1821	1	100	-1.1484e+06	16.1416	1.13534	910	0.914428	4.4689
1822	1	100	-1.14765e+06	16.1689	1.13545	919	0.911734	4.61147
1823	1	100	-1.14796e+06	16.1689	1.13645	920	0.913871	4.46745
1824	1	100	-1.14814e+06	16.1783	1.13854	932	0.912799	4.56522
1825	1	100	-1.14786e+06	16.2156	1.14387	936	0.911748	4.55097
1826	1	100	-1.14773e+06	16.3417	1.15444	942	0.913621	4.63458
1827	1	100	-1.14805e+06	16.1785	1.16398	938	0.912278	4.47394
1828	1	100	-1.14776e+06	16.0137	1.15749	942	0.913777	4.4899
1829	1	100	-1.14762e+06	16.0519	1.15562	929	0.91365	4.68486
1830	1	100	-1.14836e+06	16.0446	1.15037	925	0.913109	4.67018
1831	1	100	-1.14802e+06	16.0769	1.16144	925	0.912068	4.70693
1832	1	100	-1.14763e+06	16.1379	1.17201	929	0.909504	4.50176
1833	1	100	-1.14761e+06	16.1662	1.17876	923	0.910266	4.59524
1834	1	100	-1.14711e+06	16.1412	1.17113	906	0.909994	4.64521
1835	1	100	-1.14777e+06	16.3217	1.18527	906	0.909042	4.59403
1836	1	100	-1.148e+06	16.1952	1.18127	907	0.909152	4.61326
1837	1	100	-1.14836e+06	16.0791	1.17628	918	0.911687	4.57095
1838	1	100	-1.14761e+06	16.029	1.17629	931	0.912167	4.51383
1839	1	100	-1.1479e+06	16.0028	1.16981	919	0.91237	4.50389
1840	1	100	-1.14812e+06	16.0061	1.17584	920	0.912883	4.43659
1841	1	100	-1.14749e+06	15.9902	1.19378	930	0.907093	4.55346
1842	1	100	-1.14771e+06	16.1656	1.19864	910	0.910376	4.68049
1843	1	100	-1.14753e+06	16.1072	1.18678	907	0.905744	4.66372
1844	1	100	-1.14798e+06	16.0962	1.17635	895	0.909357	4.74495
1845	1	100	-1.14725e+06	16.1291	1.16965	891	0.909013	4.62045
1846	1	100	-1.14727e+06	16.0776	1.17565	915	0.907147	4.68368
1847	1	100	-1.14753e+06	16.1602	1.17464	906	0.913574	4.58816
1848	1	100	-1.14765e+06	16.2296	1.15875	913	0.9142	4.60657
1849	1	100	-1.14765e+06	16.2113	1.14246	917	0.911714	4.60507
1850	1	100	-1.14804e+06	16.2149	1.14714	915	0.91139	4.71299
1851	1	100	-1.14773e+06	16.3919	1.13522	917	0.910774	4.68255
1852	1	100	-1.14775e+06	16.3214	1.14353	923	0.911478	4.72966
1853	1	100	-1.14776e+06	16.3651	1.14815	918	0.909492	4.60901
1854	1	100	-1.14791e+06	16.2975	1.14504	926	0.909848	4.60955
1855	1	100	-1.14782e+06	16.3949	1.1512	925	0.912952	4.60205
1856	1	100	-1.14846e+06	16.3076	1.14688	918	0.911368	4.69603
1857	1	100	-1.14858e+06	16.2365	1.15271	925	0.909389	4.68616
1858	1	100	-1.14774e+06	16.327	1.15591	926	0.906723	4.76559
1859	1	100	-1.14805e+06	16.4439	1.14346	911	0.9102	4.69268
1860	1	100	-1.14855e+06	16.4562	1.13872	903	0.911283	4.67594
1861	1	100	-1.14772e+06	16.3449	1.14364	895	0.907321	4.60618
1862	1	100	-1.14801e+06	16.3165	1.1526	894	0.909681	4.80553
1863	1	100	-1.14787e+06	16.3622	1.16663	880	0.907094	4.76029
1864	1	100	-1.1481e+06	16.3201	1.16921	891	0.912787	4.56203
1865	1	100	-1.148e+06	16.278	1.17246	887	0.912166	4.6511
1866	1	100	-1.14792e+06	16.1744	1.16069	893	0.910585	4.79781
1867	1	100	-1.14825e+06	16.2974	1.16442	883	0.911244	4.67721
1868	1	100	-1.14759e+06	16.2113	1.16101	896	0.908181	4.76074
1869	1	100	-1.14814e+06	16.4003	1.16488	898	0.908019	4.63426
1870	1	100	-1.14813e+06	16.2611	1.16685	888	0.909752	4.61346
1871	1	100	-1.1482e+06	16.1046	1.16294	896	0.909709	4.601
1872	1	100	-1.14805e+06	16.1793	1.15872	901	0.912791	4.62543
1873	1	100	-1.14835e+06	16.0945	1.15871	892	0.912727	4.64815
1874	1	100	-1.14764e+06	16.1264	1.15695	905	0.912284	4.64557
1875	1	100	-1.14845e+06	16.1726	1.14892	910	0.910199	4.64098
1876	1	100	-1.1487e+06	16.3423	1.13607	907	0.914114	4.679
1877	1	100	-1.14895e+06	16.2472	1.1402	897	0.91306	4.65163
1878	1	100	-1.14895e+06	16.1711	1.13964	900	0.917203	4.71387
1879	1	100	-1.14864e+06	16.112	1.14014	895	0.914782	4.71946
1880	1	100	-1.14869e+06	16.0601	1.13418	904	0.91498	4.71162
1881	1	100	-1.14967e+06	16.1498	1.12994	891	0.918457	4.67543
1882	1	100	-1.14928e+06	16.1394	1.13412	904	0.919769	4.67648
1883	1	100	-1.14883e+06	16.1446	1.13149	899	0.917339	4.72422
1884	1	100	-1.14863e+06	15.9905	1.13626	900	0.915278	4.76155
1885	1	100	-1.14874e+06	15.9539	1.13439	906	0.917881	4.60063
1886	1	100	-1.14812e+06	16.2107	1.13841	922	0.913502	4.52679
1887	1	100	-1.14837e+06	16.2376	1.13916	911	0.919723	4.62764
1888	1	100	-1.149e+06	16.3253	1.12821	910	0.919343	4.65202
1889	1	100	-1.14915e+06	16.4125	1.11679	933	0.919652	4.60509
1890	1	100	-1.14844e+06	16.3198	1.12047	921	0.919316	4.61985
1891	1	100	-1.14873e+06	16.2498	1.12002	915	0.916323	4.66671
1892	1	100	-1.1484e+06	16.364	1.11693	914	0.916625	4.65118
1893	1	100	-1.14818e+06	16.4185	1.11209	914	0.917376	4.57872
1894	1	100	-1.14844e+06	16.4183	1.11683	913	0.923982	4.59961
1895	1	100	-1.14883e+06	16.2364	1.11426	926	0.918641	4.56806
1896	1	100	-1.14873e+06	16.3133	1.10983	926	0.918845	4.65338
1897	1	100	-1.14841e+06	16.2888	1.1214	929	0.917467	4.61747
1898	1	100	-1.14788e+06	16.0989	1.12191	929	0.915442	4.6009
1899	1	100	-1.14745e+06	16.2781	1.12723	955	0.917873	4.67468
1900	1	100	-1.14815e+06	16.1972	1.13074	927	0.918531	4.63574
1901	1	100	-1.14755e+06	16.1542	1.14275	947	0.916676	4.58451
1902	1	100	-1.14789e+06	16.1247	1.13326	952	0.915495	4.58797
1903	1	100	-1.14754e+06	16.1853	1.13992	945	0.915446	4.61614
1904	1	100	-1.14831e+06	16.2713	1.13682	924	0.916037	4.61266
1905	1	100	-1.14799e+06	16.3479	1.12968	923	0.916027	4.63123
1906	1	100	-1.14839e+06	16.2291	1.12847	914	0.919551	4.56824
1907	1	100	-1.1487e+06	16.2391	1.1238	920	0.916709	4.59035
1908	1	100	-1.14854e+06	16.2824	1.1174	912	0.916813	4.60993
1909	1	100	-1.14751e+06	16.3512	1.13201	914	0.913445	4.49084
1910	1	100	-1.14777e+06	16.2564	1.14246	931	0.912745	4.54951
1911	1	100	-1.14745e+06	16.1225	1.15538	943	0.908037	4.57022
1912	1	100	-1.14789e+06	16.0997	1.15609	934	0.908554	4.61908
1913	1	100	-1.1483e+06	16.1714	1.154	914	0.912072	4.5444
1914	1	100	-1.1481e+06	16.3746	1.13329	921	0.912585	4.58667
1915	1	100	-1.14785e+06	16.3628	1.12831	914	0.912878	4.56801
1916	1	100	-1.14776e+06	16.1791	1.14124	920	0.910707	4.4754
1917	1	100	-1.14847e+06	16.1351	1.14568	906	0.915666	4.66727
1918	1	100	-1.14892e+06	16.1156	1.12859	927	0.915482	4.60244
1919	1	100	-1.14835e+06	16.332	1.1424	916	0.916977	4.66149
1920	1	100	-1.14886e+06	16.3115	1.1359	922	0.91715	4.70413
1921	1	100	-1.14869e+06	16.3396	1.14335	909	0.917572	4.65192
1922	1	100	-1.14856e+06	16.3191	1.13245	922	0.918423	4.68994
1923	1	100	-1.14844e+06	16.3759	1.14237	933	0.917037	4.60726
1924	1	100	-1.14814e+06	16.226	1.14614	923	0.910923	4.7892
1925	1	100	-1.14842e+06	16.0559	1.14455	917	0.913531	4.58392
1926	1	100	-1.14874e+06	16.1112	1.13564	926	0.915065	4.74804
1927	1	100	-1.14877e+06	16.1043	1.12884	909	0.91892	4.75769
1928	1	100	-1.14938e+06	15.9964	1.1222	922	0.91983	4.5992
1929	1	100	-1.14878e+06	16.1073	1.11298	934	0.918618	4.60296
1930	1	100	-1.14934e+06	16.0787	1.10948	927	0.91792	4.52829
1931	1	100	-1.14952e+06	16.1915	1.11355	930	0.920748	4.70809
1932	1	100	-1.14955e+06	16.0956	1.10197	942	0.919015	4.70907
1933	1	100	-1.14921e+06	16.2273	1.11537	942	0.919962	4.71989
1934	1	100	-1.14898e+06	16.2282	1.11886	934	0.919	4.77602
1935	1	100	-1.14886e+06	16.2702	1.12089	938	0.919418	4.65823
1936	1	100	-1.14847e+06	16.074	1.12494	929	0.919531	4.5625
1937	1	100	-1.14863e+06	16.1776	1.12466	934	0.92318	4.69819
1938	1	100	-1.14866e+06	16.179	1.121	933	0.922347	4.60969
1939	1	100	-1.14846e+06	16.1455	1.13054	925	0.917395	4.49385
1940	1	100	-1.14841e+06	16.1314	1.12456	918	0.9202	4.59718
1941	1	100	-1.14815e+06	16.2181	1.13863	927	0.918279	4.60799
1942	1	100	-1.14781e+06	16.185	1.13321	908	0.917133	4.68028
1943	1	100	-1.14819e+06	15.9881	1.13004	924	0.914934	4.66019
1944	1	100	-1.14843e+06	16.0879	1.13703	908	0.918493	4.61064
1945	1	100	-1.14823e+06	16.1063	1.11773	926	0.915424	4.51796
1946	1	100	-1.14794e+06	16.1485	1.11346	910	0.914319	4.58851
1947	1	100	-1.14778e+06	16.3822	1.12779	921	0.911796	4.66693
1948	1	100	-1.14769e+06	16.4822	1.12137	931	0.913537	4.66534
1949	1	100	-1.14757e+06	16.4128	1.1317	926	0.91327	4.72481
1950	1	100	-1.14713e+06	16.4316	1.12738	931	0.91408	4.75993
1951	1	100	-1.14804e+06	16.4598	1.13005	914	0.917093	4.61979
1952	1	100	-1.14767e+06	16.3754	1.1322	930	0.916923	4.63923
1953	1	100	-1.14762e+06	16.3099	1.14141	920	0.91361	4.45261
1954	1	100	-1.14722e+06	16.3919	1.13363	933	0.915115	4.50464
1955	1	100	-1.14686e+06	16.3281	1.13577	956	0.914927	4.63537
1956	1	100	-1.14745e+06	16.2837	1.12421	926	0.914383	4.62297
1957	1	100	-1.14773e+06	16.1845	1.11749	918	0.916569	4.72322
1958	1	100	-1.14774e+06	16.1887	1.11425	916	0.918597	4.68536
1959	1	100	-1.14755e+06	16.28	1.12061	923	0.917098	4.62261
1960	1	100	-1.14746e+06	16.1653	1.12131	917	0.914278	4.69278
1961	1	100	-1.14774e+06	16.2171	1.12815	902	0.915217	4.66104
1962	1	100	-1.14728e+06	16.1048	1.12835	908	0.91533	4.52627
1963	1	100	-1.14775e+06	16.0689	1.13265	910	0.917176	4.5441
1964	1	100	-1.14822e+06	16.141	1.12875	910	0.915535	4.60433
1965	1	100	-1.14851e+06	16.1348	1.11412	926	0.9176	4.66988
1966	1	100	-1.14848e+06	16.1392	1.11668	915	0.919094	4.68175
1967	1	100	-1.14806e+06	16.12	1.11401	917	0.920022	4.60232
1968	1	100	-1.14836e+06	16.1623	1.13483	914	0.919001	4.61734
1969	1	100	-1.1482e+06	16.3002	1.1322	899	0.921006	4.63997
1970	1	100	-1.14791e+06	16.2334	1.11671	899	0.916538	4.49943
1971	1	100	-1.14788e+06	16.1014	1.1276	895	0.917471	4.51141
1972	1	100	-1.14817e+06	16.1047	1.1264	895	0.917264	4.50419
1973	1	100	-1.1481e+06	16.1969	1.13431	898	0.913472	4.52656
1974	1	100	-1.14841e+06	16.171	1.13123	909	0.917594	4.55097
1975	1	100	-1.14819e+06	16.3268	1.13265	886	0.917418	4.60521
1976	1	100	-1.14769e+06	16.3911	1.13463	917	0.915255	4.60375
1977	1	100	-1.14874e+06	16.2493	1.13274	916	0.917369	4.62797
1978	1	100	-1.14861e+06	16.1899	1.13375	910	0.917169	4.51697
1979	1	100	-1.14843e+06	16.1394	1.13597	929	0.916756	4.6764
1980	1	100	-1.14785e+06	16.2968	1.13901	916	0.915664	4.61097
1981	1	100	-1.14812e+06	16.297	1.13025	909	0.914811	4.59606
1982	1	100	-1.14813e+06	16.2622	1.13151	927	0.912645	4.62644
1983	1	100	-1.14804e+06	16.3508	1.13199	911	0.913709	4.62124
1984	1	100	-1.14825e+06	16.1986	1.14848	901	0.913249	4.67986
1985	1	100	-1.14853e+06	16.2835	1.14716	901	0.91616	4.59906
1986	1	100	-1.14818e+06	16.2714	1.1448	907	0.914462	4.66345
1987	1	100	-1.1479e+06	16.1513	1.14737	911	0.912416	4.51708
1988	1	100	-1.14754e+06	16.256	1.15181	922	0.913579	4.57771
1989	1	100	-1.14857e+06	16.3885	1.13527	923	0.917741	4.60435
1990	1	100	-1.14837e+06	16.3214	1.13012	909	0.920401	4.6301
1991	1	100	-1.14834e+06	16.4129	1.12011	896	0.916496	4.60111
1992	1	100	-1.14867e+06	16.3615	1.12925	910	0.915996	4.61499
1993	1	100	-1.14872e+06	16.2973	1.12829	902	0.914232	4.62761
1994	1	100	-1.14885e+06	16.2323	1.13787	919	0.91248	4.58021
1995	1	100	-1.14887e+06	16.2369	1.1371	918	0.914043	4.56909
1996	1	100	-1.14818e+06	16.2428	1.14884	920	0.914758	4.54131
1997	1	100	-1.14829e+06	16.2303	1.14857	931	0.912948	4.60214
1998	1	100	-1.14816e+06	16.2776	1.15002	910	0.909405	4.55248
[truncated: 9,242 more rows]
